# Supplementary material for: Design, Synthesis, Biological Evaluation and Silico Prediction of Novel Sinomenine Derivatives
Source: MDPI journal article supplement (doi:10.3390/molecules26113466), 2021-06-07
Supplement: s1 [file s1]

**Design, Synthesis, Biological Evaluation and Silico Prediction of Novel Sinomenine Derivatives**

Shoujie Li<sup>1</sup>, Mingjie Gao<sup>2</sup>, Xin Nian<sup>3</sup>, Liyu Zhang<sup>4</sup>, Jinjie Li<sup>5</sup>, Dongmei Cui<sup>3,\*</sup>, Chen Zhang<sup>4,\*</sup>, Changqi Zhao<sup>1,\*</sup>

<sup>1</sup> Gene Engineering and Biotechnology Beijing Key Laboratory, College of Life Science, Beijing Normal University, 19 XijiekouWai Avenue, Beijing 100875, China; 201831200027@mail.bnu.edu.cn

<sup>2</sup> Research Group Pharmaceutical Bioinformatics, Institute of Pharmaceutical Sciences, Albert-Ludwigs-Universität Freiburg, Freiburg im Breisgau, 79106, Germany; mingjie.gao@pharmazie.uni-freiburg.de

<sup>3</sup> College of Pharmaceutical Science, Zhejiang University of Technology, 18 Chaowang Road, Hangzhou 310014, China; zjdqnx@126.com

<sup>4</sup> College of Pharmaceutical Sciences, Zhejiang University, 866 Yuhangtang Road, Hangzhou 310058, China; liyuzhang@zju.edu.cn

<sup>5</sup> Beijing Key Laboratory of Bioactive Substances and Functional Foods, Beijing Union University, 197 Beitucheng West Road, Beijing 100191, China; lijinnie.7785004@163.com

\* Correspondence: cuidongmei@zjut.edu.cn (D.C.); chenzhang@zju.edu.cn (C.Z.); 04020@bnu.edu.cn (C.Z.); Tel: +86-010-58805046 (Changqi Zhao)

**This Word file includes:**

Figures S1 to S59

Tables S1 to S8.

Table of Contents

|                    |                                                                                                 |                    |                                                      |
|--------------------|-------------------------------------------------------------------------------------------------|--------------------|------------------------------------------------------|
| <b>Figure S1.</b>  | <sup>1</sup> H NMR spectrum of compound <b>5a</b> .                                             | <b>Figure S2.</b>  | <sup>13</sup> C NMR spectrum of compound <b>5a</b> . |
| <b>Figure S3.</b>  | <sup>1</sup> H NMR spectrum of compound <b>5b</b> .                                             | <b>Figure S4.</b>  | <sup>13</sup> C NMR spectrum of compound <b>5b</b> . |
| <b>Figure S5.</b>  | <sup>1</sup> H NMR spectrum of compound <b>5c</b> .                                             | <b>Figure S6.</b>  | <sup>13</sup> C NMR spectrum of compound <b>5c</b> . |
| <b>Figure S7.</b>  | <sup>1</sup> H NMR spectrum of compound <b>5d</b> .                                             | <b>Figure S8.</b>  | <sup>13</sup> C NMR spectrum of compound <b>5d</b> . |
| <b>Figure S9.</b>  | <sup>1</sup> H NMR spectrum of compound <b>5e</b> .                                             | <b>Figure S10.</b> | <sup>13</sup> C NMR spectrum of compound <b>5e</b> . |
| <b>Figure S11.</b> | <sup>1</sup> H NMR spectrum of compound <b>5f</b> .                                             | <b>Figure S12.</b> | <sup>13</sup> C NMR spectrum of compound <b>5f</b> . |
| <b>Figure S13.</b> | <sup>1</sup> H NMR spectrum of compound <b>5g</b> .                                             | <b>Figure S14.</b> | <sup>13</sup> C NMR spectrum of compound <b>5g</b> . |
| <b>Figure S15.</b> | <sup>1</sup> H NMR spectrum of compound <b>5h</b> .                                             | <b>Figure S16.</b> | <sup>13</sup> C NMR spectrum of compound <b>5h</b> . |
| <b>Figure S17.</b> | <sup>1</sup> H NMR spectrum of compound <b>5i</b> .                                             | <b>Figure S18.</b> | <sup>13</sup> C NMR spectrum of compound <b>5i</b> . |
| <b>Figure S19.</b> | <sup>1</sup> H NMR spectrum of compound <b>5j</b> .                                             | <b>Figure S20.</b> | <sup>13</sup> C NMR spectrum of compound <b>5j</b> . |
| <b>Figure S21.</b> | <sup>1</sup> H NMR spectrum of compound <b>5k</b> .                                             | <b>Figure S22.</b> | <sup>13</sup> C NMR spectrum of compound <b>5k</b> . |
| <b>Figure S23.</b> | HRMS spectrum of compound <b>6a</b> .                                                           | <b>Figure S24.</b> | <sup>1</sup> H NMR spectrum of compound <b>6a</b> .  |
| <b>Figure S25.</b> | <sup>13</sup> C NMR spectrum of compound <b>6a</b> .                                            | <b>Figure S26.</b> | HRMS spectrum of compound <b>6b</b> .                |
| <b>Figure S27.</b> | <sup>1</sup> H NMR spectrum of compound <b>6b</b> .                                             | <b>Figure S28.</b> | <sup>13</sup> C NMR spectrum of compound <b>6b</b> . |
| <b>Figure S29.</b> | HRMS spectrum of compound <b>6c</b> .                                                           | <b>Figure S30.</b> | <sup>1</sup> H NMR spectrum of compound <b>6c</b> .  |
| <b>Figure S31.</b> | <sup>13</sup> C NMR spectrum of compound <b>6c</b> .                                            | <b>Figure S32.</b> | HRMS spectrum of compound <b>6d</b> .                |
| <b>Figure S33.</b> | <sup>1</sup> H NMR spectrum of compound <b>6d</b> .                                             | <b>Figure S34.</b> | <sup>13</sup> C NMR spectrum of compound <b>6d</b> . |
| <b>Figure S35.</b> | HRMS spectrum of compound <b>6e</b> .                                                           | <b>Figure S36.</b> | <sup>1</sup> H NMR spectrum of compound <b>6e</b> .  |
| <b>Figure S37.</b> | <sup>13</sup> C NMR spectrum of compound <b>6e</b> .                                            | <b>Figure S38.</b> | HRMS spectrum of compound <b>6f</b> .                |
| <b>Figure S39.</b> | <sup>1</sup> H NMR spectrum of compound <b>6f</b> .                                             | <b>Figure S40.</b> | <sup>13</sup> C NMR spectrum of compound <b>6f</b> . |
| <b>Figure S41.</b> | HRMS spectrum of compound <b>6g</b> .                                                           | <b>Figure S42.</b> | <sup>1</sup> H NMR spectrum of compound <b>6g</b> .  |
| <b>Figure S43.</b> | <sup>13</sup> C NMR spectrum of compound <b>6g</b> .                                            | <b>Figure S44.</b> | HRMS spectrum of compound <b>6h</b> .                |
| <b>Figure S45.</b> | <sup>1</sup> H NMR spectrum of compound <b>6h</b> .                                             | <b>Figure S46.</b> | <sup>13</sup> C NMR spectrum of compound <b>6h</b> . |
| <b>Figure S47.</b> | HRMS spectrum of compound <b>6i</b> .                                                           | <b>Figure S48.</b> | <sup>1</sup> H NMR spectrum of compound <b>6i</b> .  |
| <b>Figure S49.</b> | <sup>13</sup> C NMR spectrum of compound <b>6i</b> .                                            | <b>Figure S50.</b> | HRMS spectrum of compound <b>6j</b> .                |
| <b>Figure S51.</b> | <sup>1</sup> H NMR spectrum of compound <b>6j</b> .                                             | <b>Figure S52.</b> | <sup>13</sup> C NMR spectrum of compound <b>6j</b> . |
| <b>Figure S53.</b> | HRMS spectrum of compound <b>6k</b> .                                                           | <b>Figure S54.</b> | <sup>1</sup> H NMR spectrum of compound <b>6k</b> .  |
| <b>Figure S55.</b> | <sup>13</sup> C NMR spectrum of compound <b>6k</b> .                                            | <b>Figure S56.</b> | HRMS spectrum of compound <b>6l</b> .                |
| <b>Figure S57.</b> | <sup>1</sup> H NMR spectrum of compound <b>6l</b> .                                             | <b>Figure S58.</b> | <sup>13</sup> C NMR spectrum of compound <b>6l</b> . |
| <b>Figure S59.</b> | The total energy of molecular docking between compounds and each target.                        |                    |                                                      |
| <b>Table S1.</b>   | Mean ± SD values of growth inhibition ratios at 2.5 μm drug concentration.                      |                    |                                                      |
| <b>Table S2.</b>   | Mean ± SD values of growth inhibition ratios at 25 μm drug concentration.                       |                    |                                                      |
| <b>Table S3.</b>   | The total energy for the tested compounds <b>5a-5k</b> against docked proteins binding pockets. |                    |                                                      |
| <b>Table S4.</b>   | The total energy for the tested compounds <b>6a-6l</b> against docked proteins binding pockets. |                    |                                                      |
| <b>Table S5.</b>   | The various interactions for the most promising test compounds into the AKT1 binding pockets.   |                    |                                                      |
| <b>Table S6.</b>   | The various interactions for the most promising test compounds into the EGFR binding pockets.   |                    |                                                      |
| <b>Table S7.</b>   | The various interactions for the most promising test compounds into the HRAS binding pockets.   |                    |                                                      |
| <b>Table S8.</b>   | The various interactions for the most promising test compounds into the KRAS binding pockets.   |                    |                                                      |

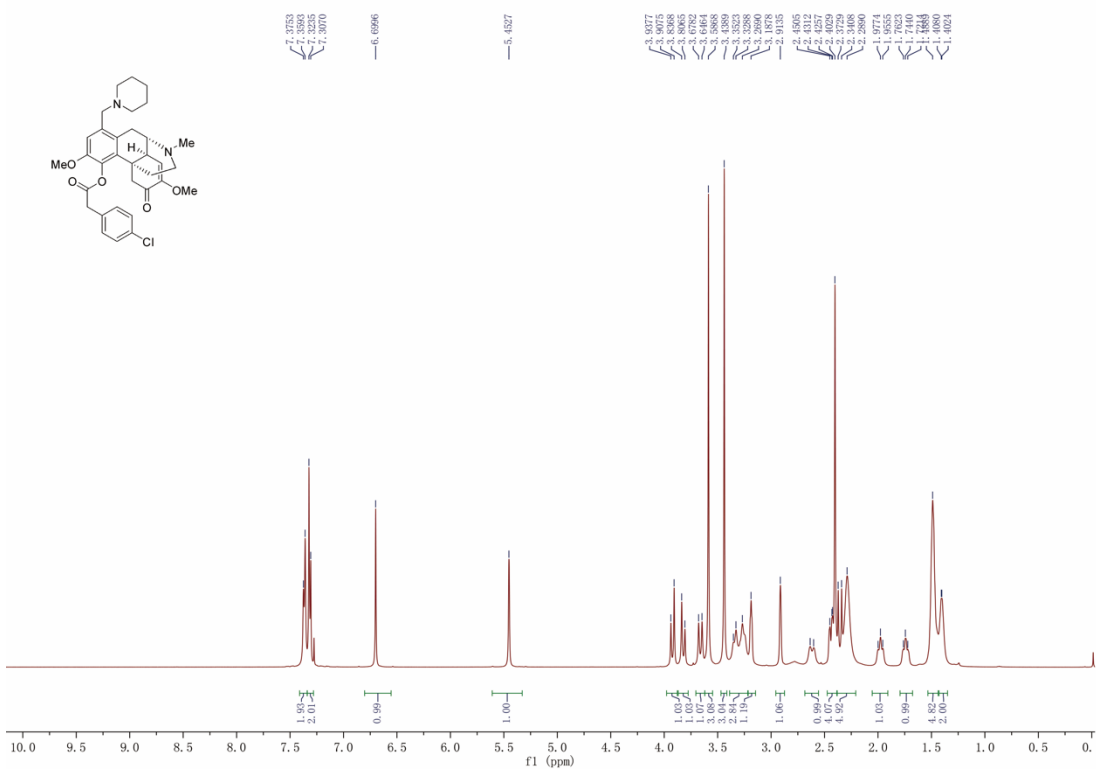

**Figure S1.**  $^1\text{H}$  NMR spectrum of compound **5a**.

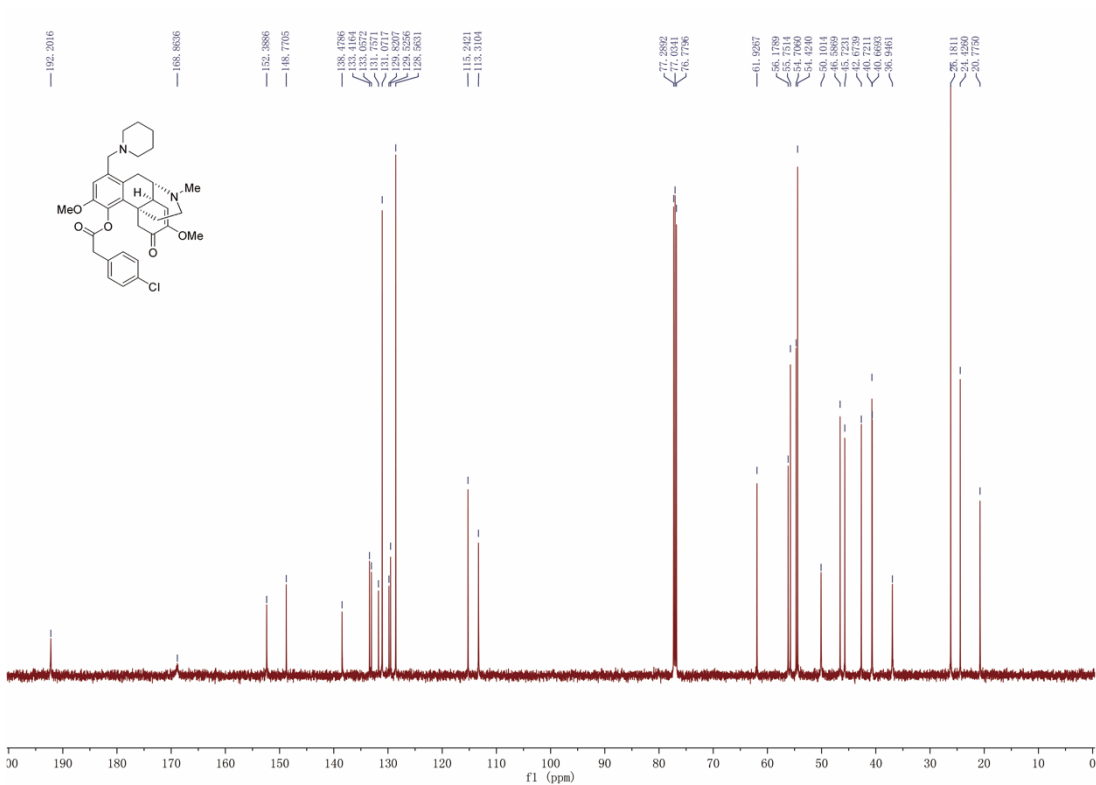

**Figure S2.**  $^{13}\text{C}$  NMR spectrum of compound **5a**.

# Supplementary material

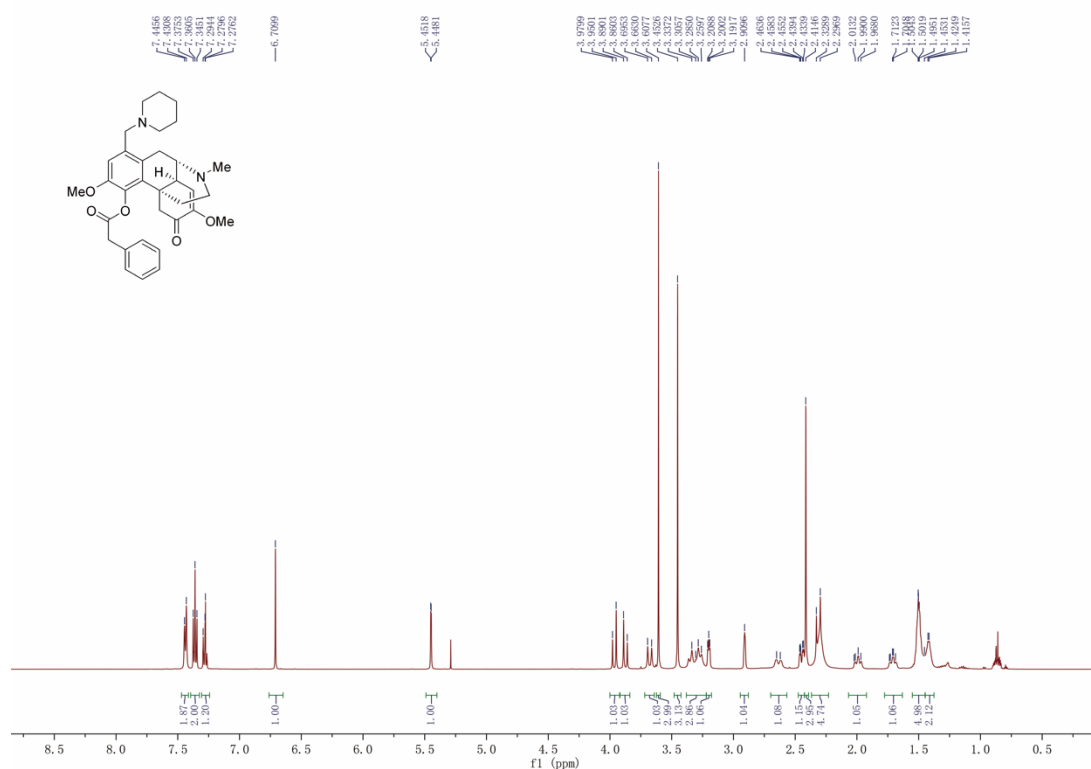

**Figure S3.** <sup>1</sup>H NMR spectrum of compound 5b.

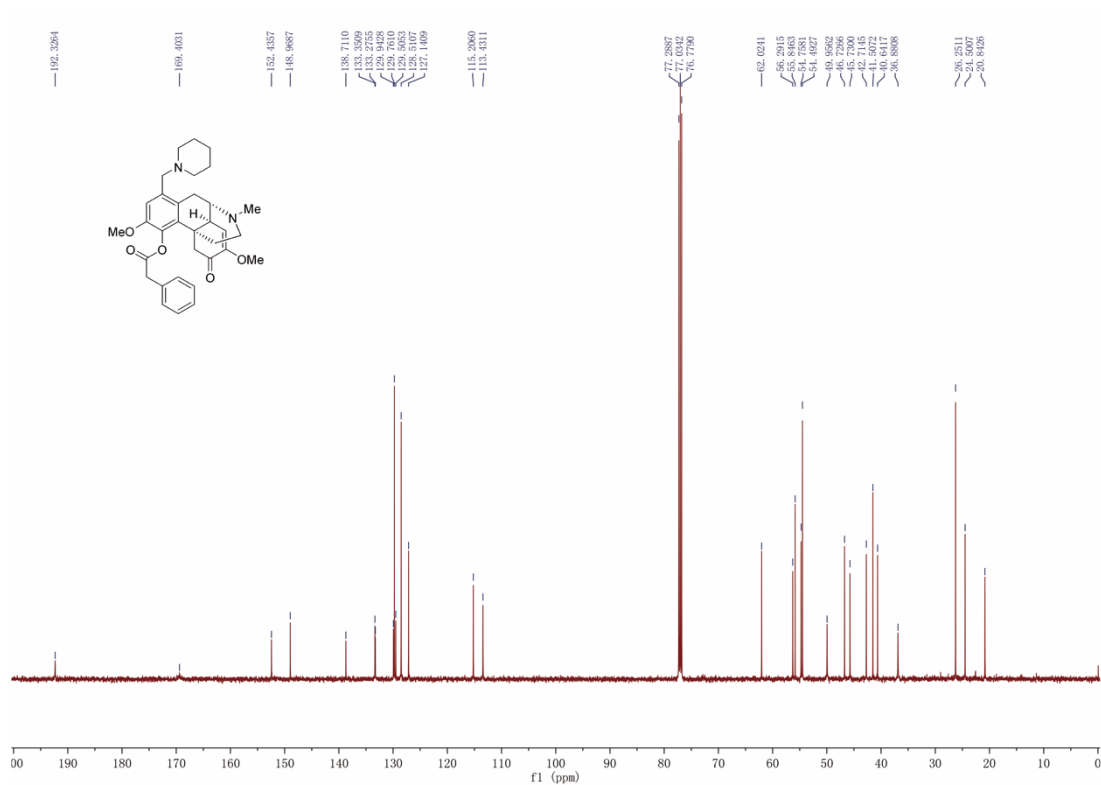

**Figure S4.** <sup>13</sup>C NMR spectrum of compound 5b.

# Supplementary material

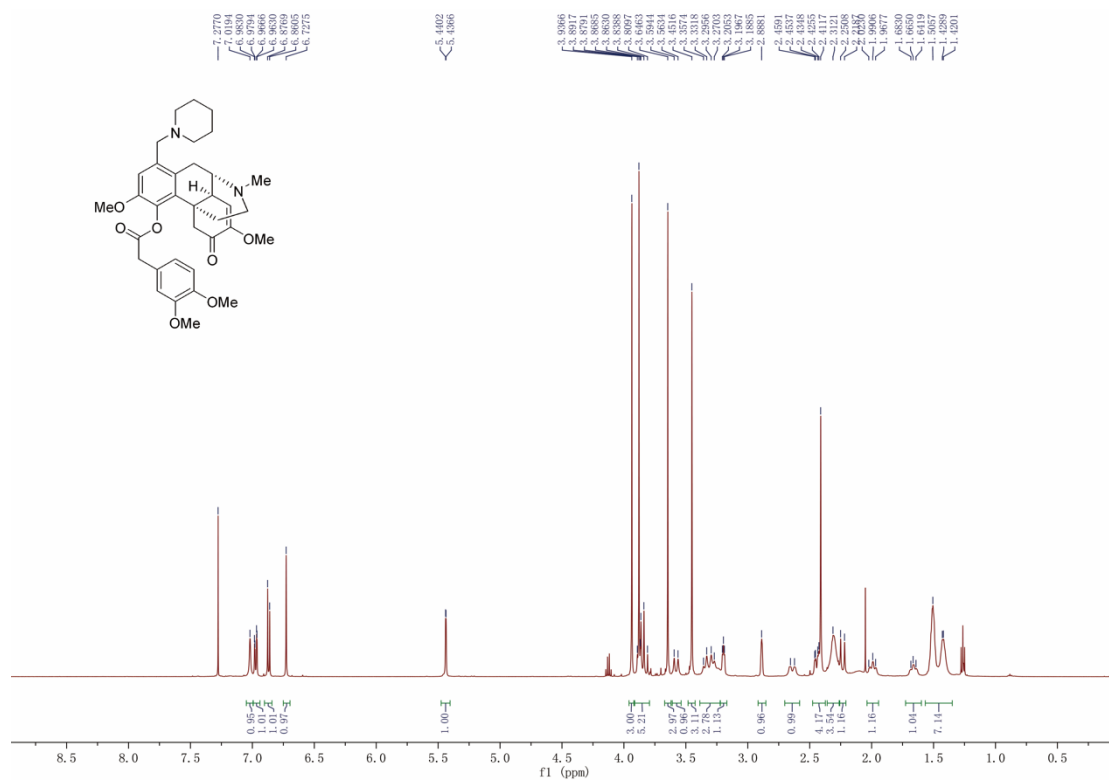

**Figure S5.** <sup>1</sup>H NMR spectrum of compound 5c.

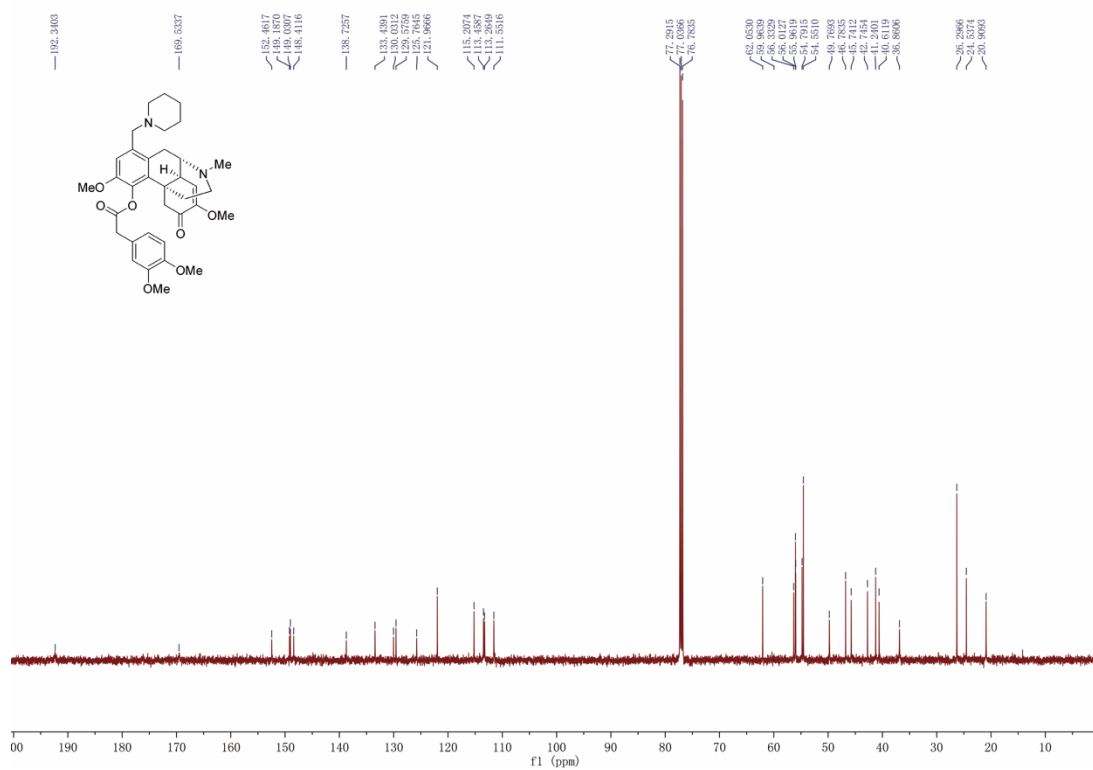

**Figure S6.** <sup>13</sup>C NMR spectrum of compound 5c.

# Supplementary material

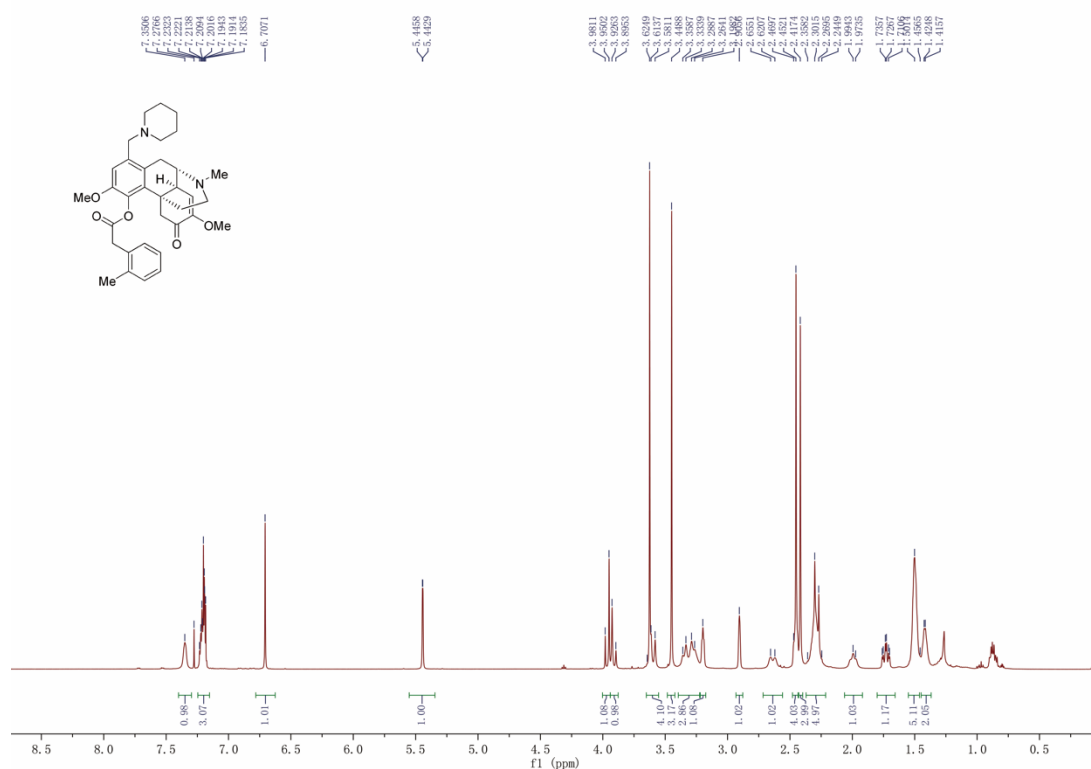

**Figure S7.** <sup>1</sup>H NMR spectrum of compound 5d.

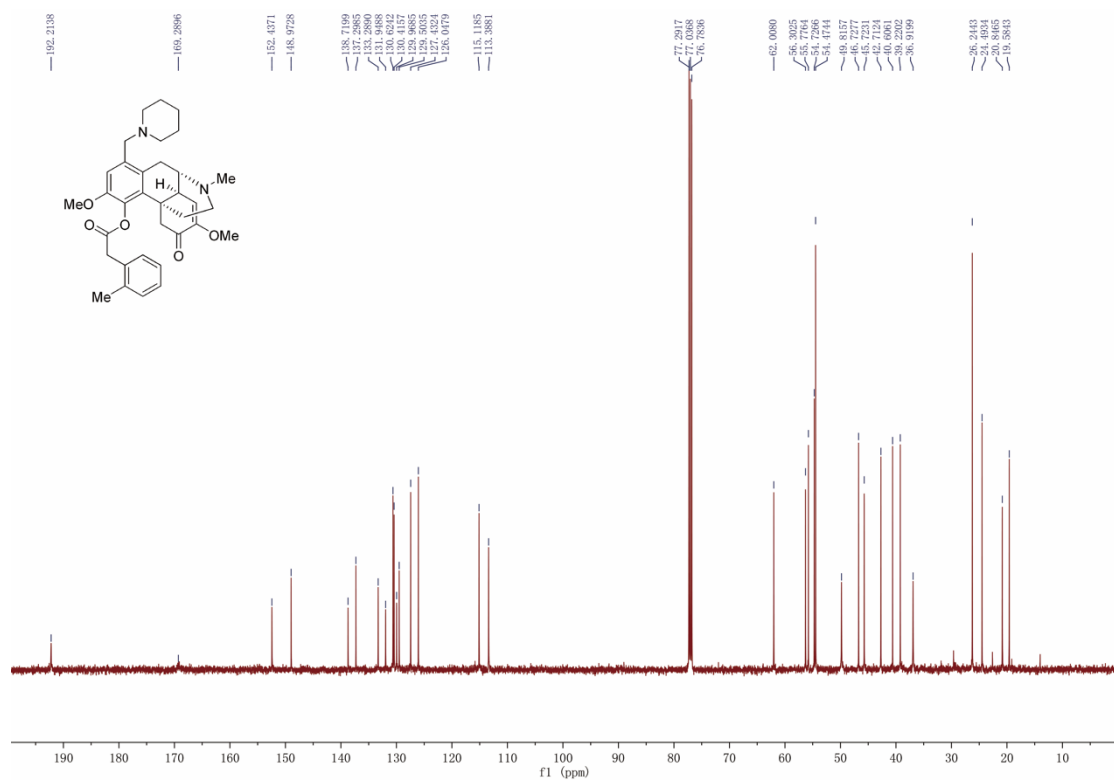

**Figure S8.** <sup>13</sup>C NMR spectrum of compound 5d.

# Supplementary material

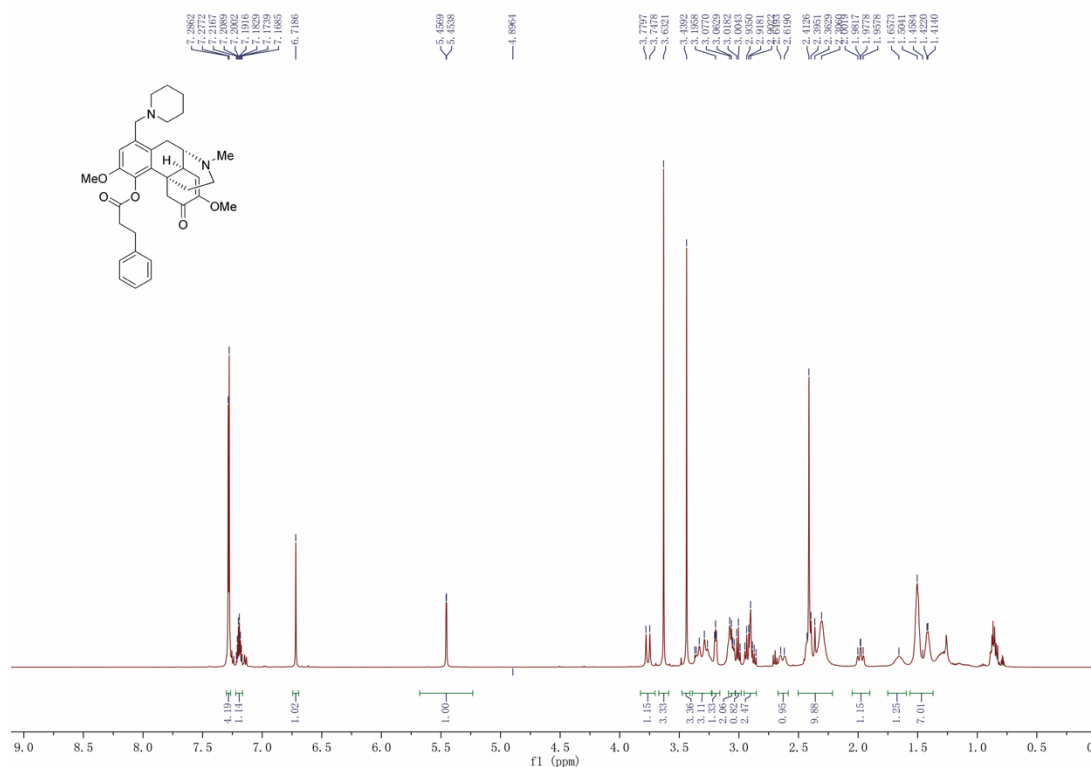

**Figure S9.** <sup>1</sup>H NMR spectrum of compound 5e.

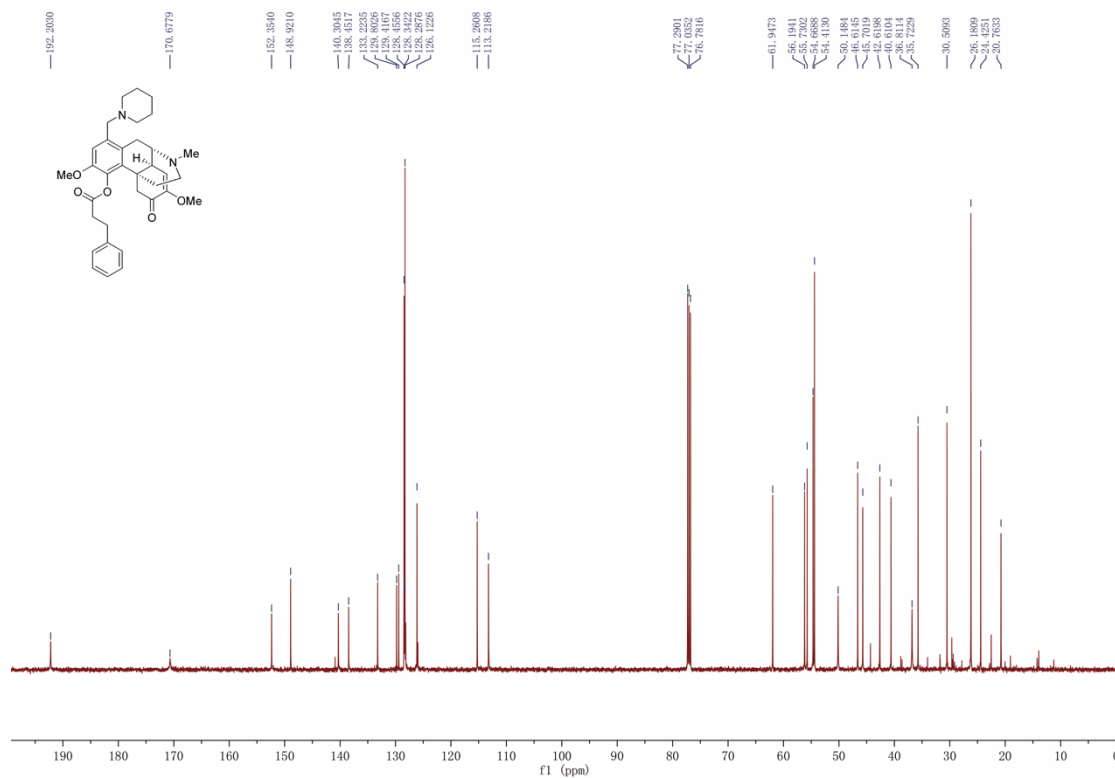

**Figure S10.** <sup>13</sup>C NMR spectrum of compound 5e.





# Supplementary material

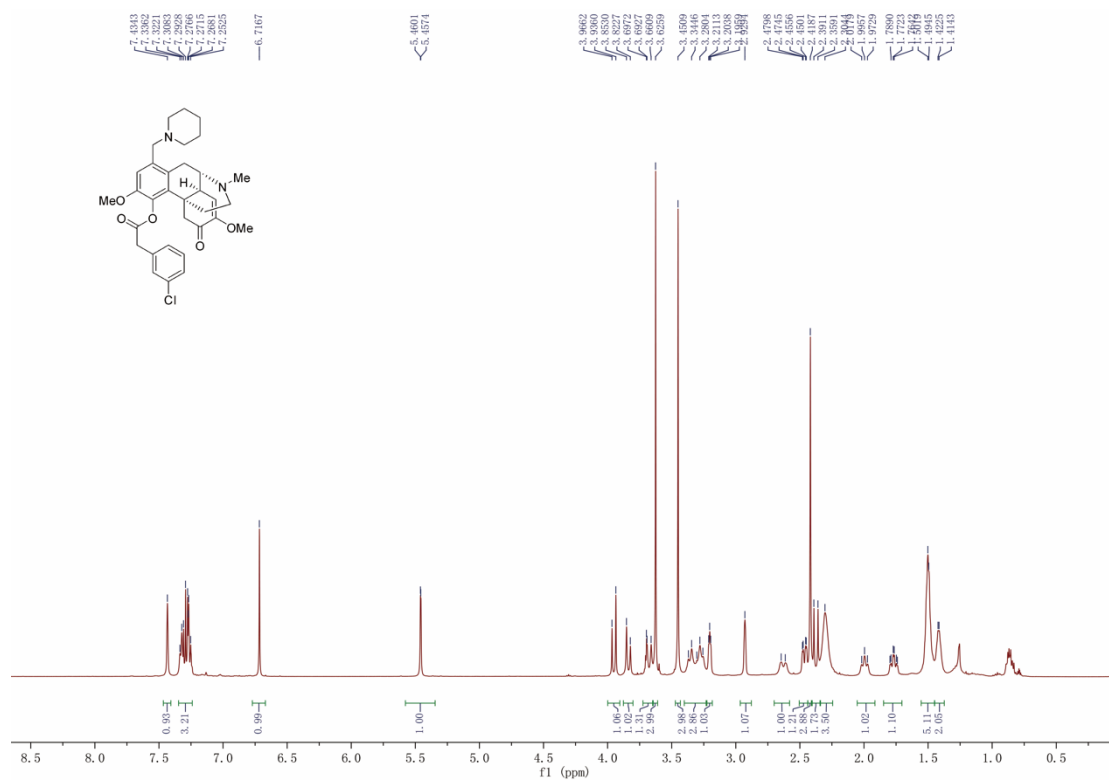

**Figure S13.**  $^1\text{H}$  NMR spectrum of compound **5g**.

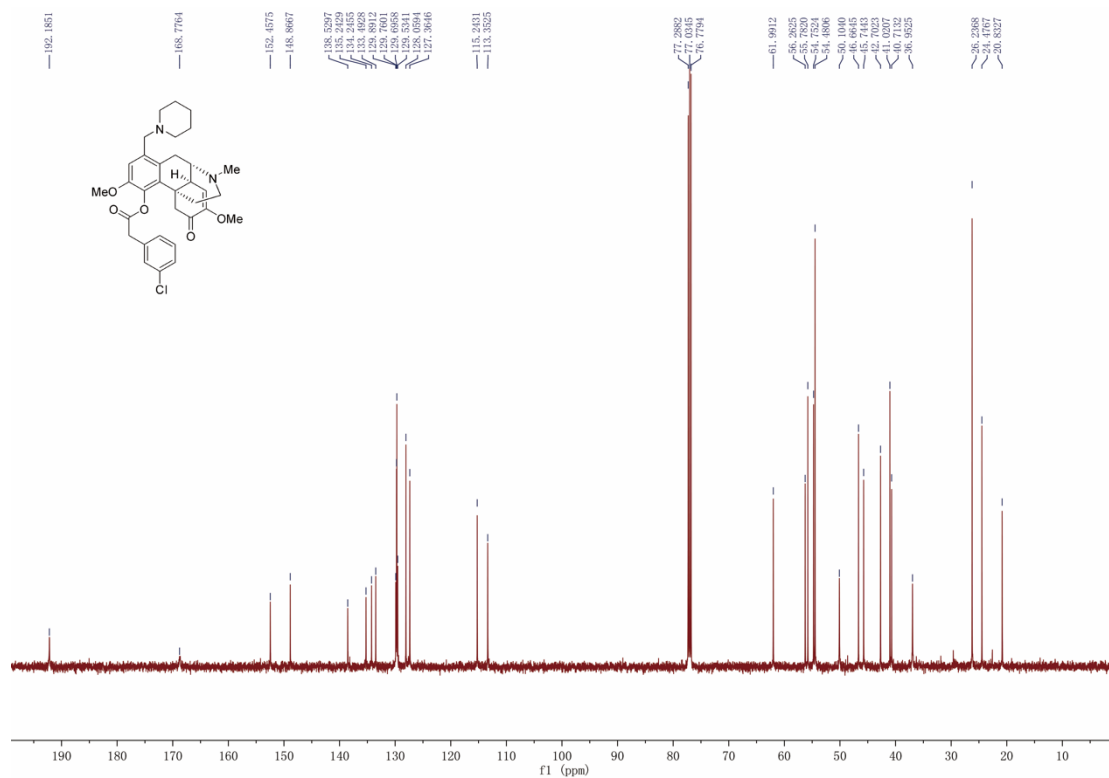

**Figure S14.**  $^{13}\text{C}$  NMR spectrum of compound **5g**.

# Supplementary material

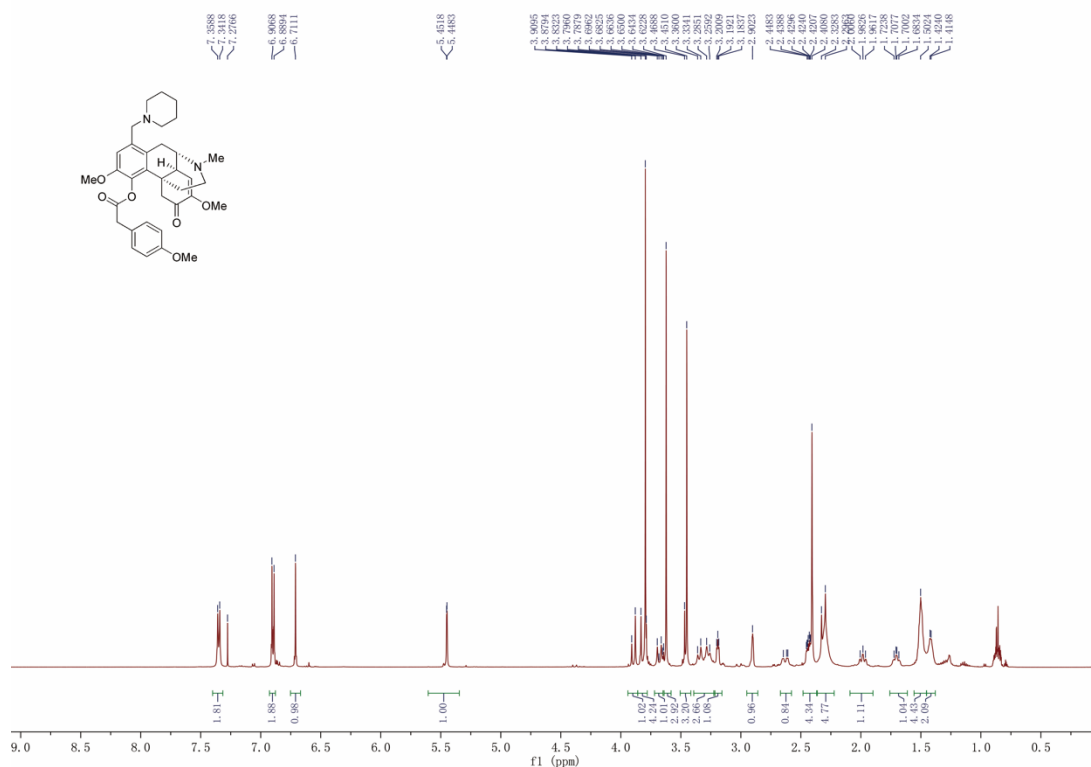

**Figure S15.** <sup>1</sup>H NMR spectrum of compound **5h**.

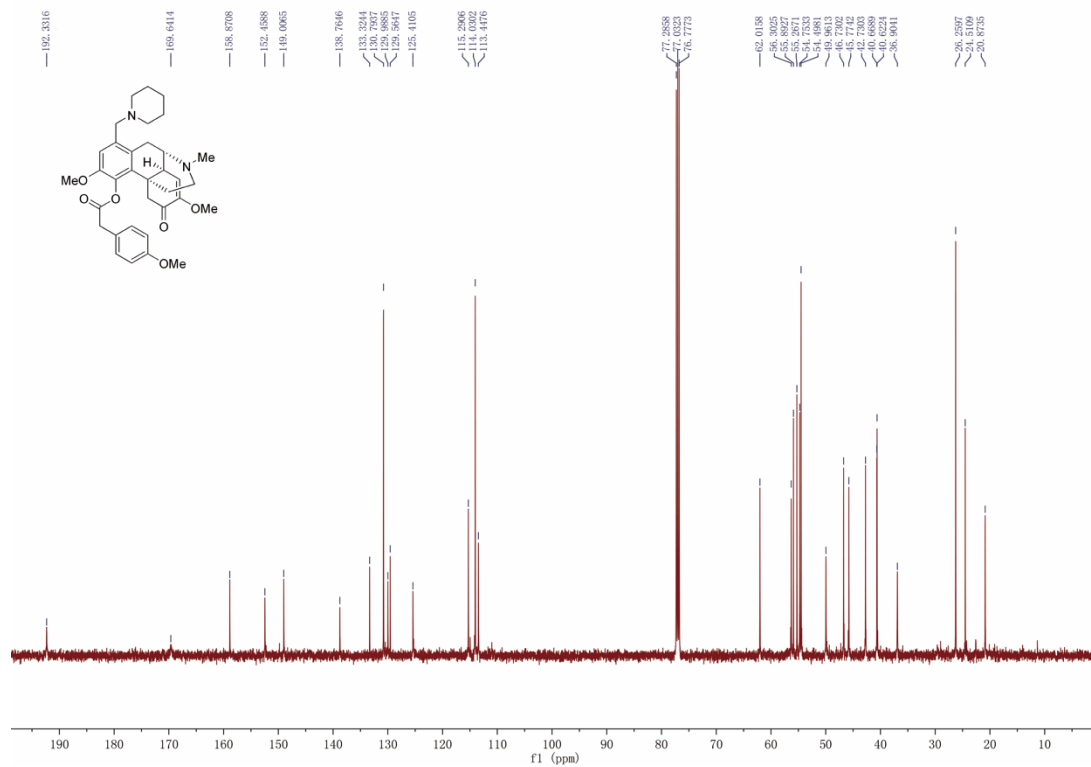

**Figure S16.** <sup>13</sup>C NMR spectrum of compound **5h**.

# Supplementary material

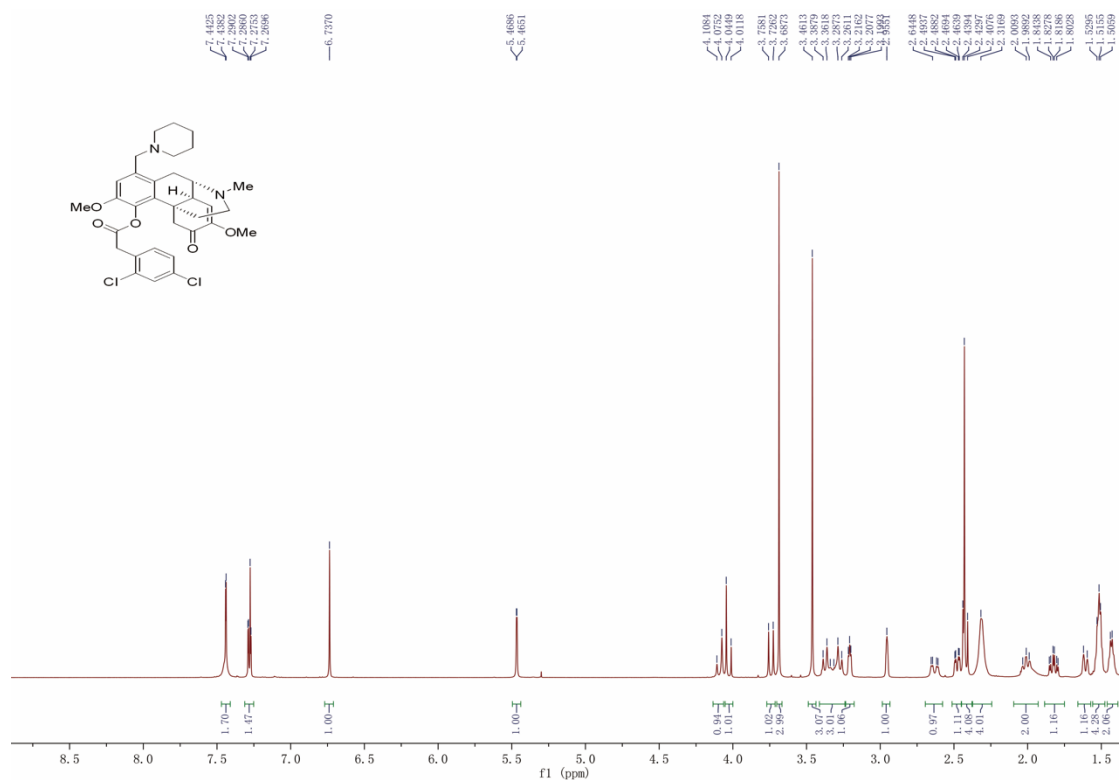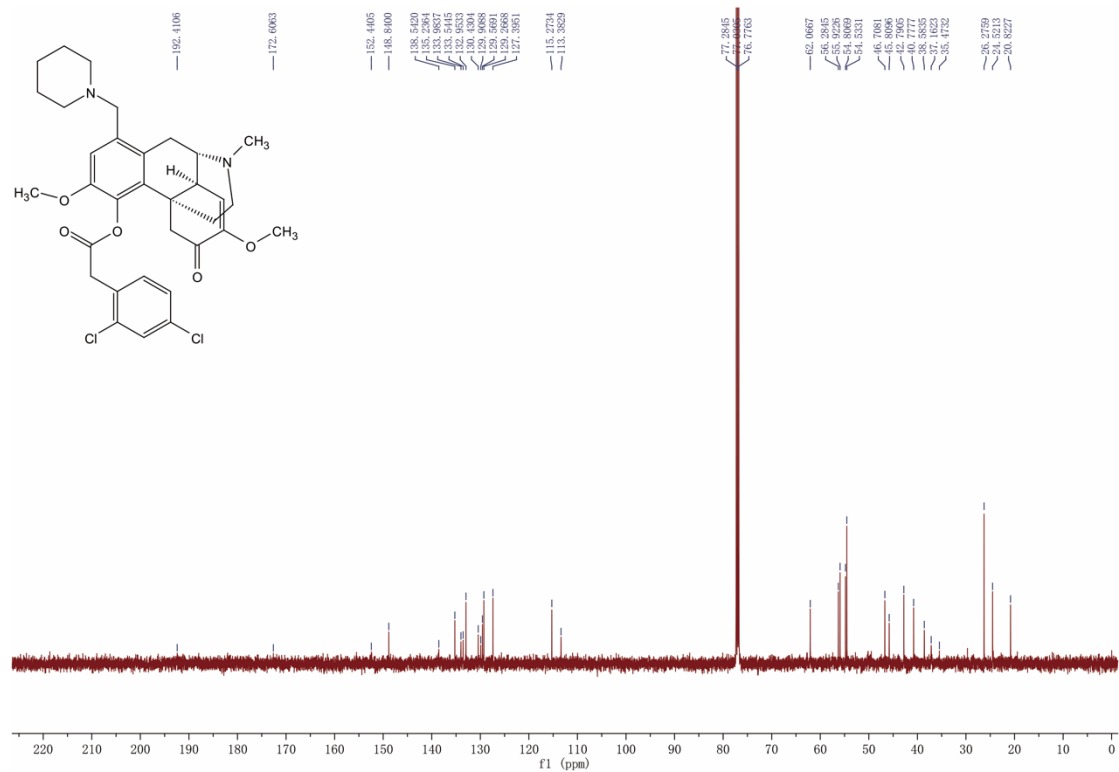

# Supplementary material

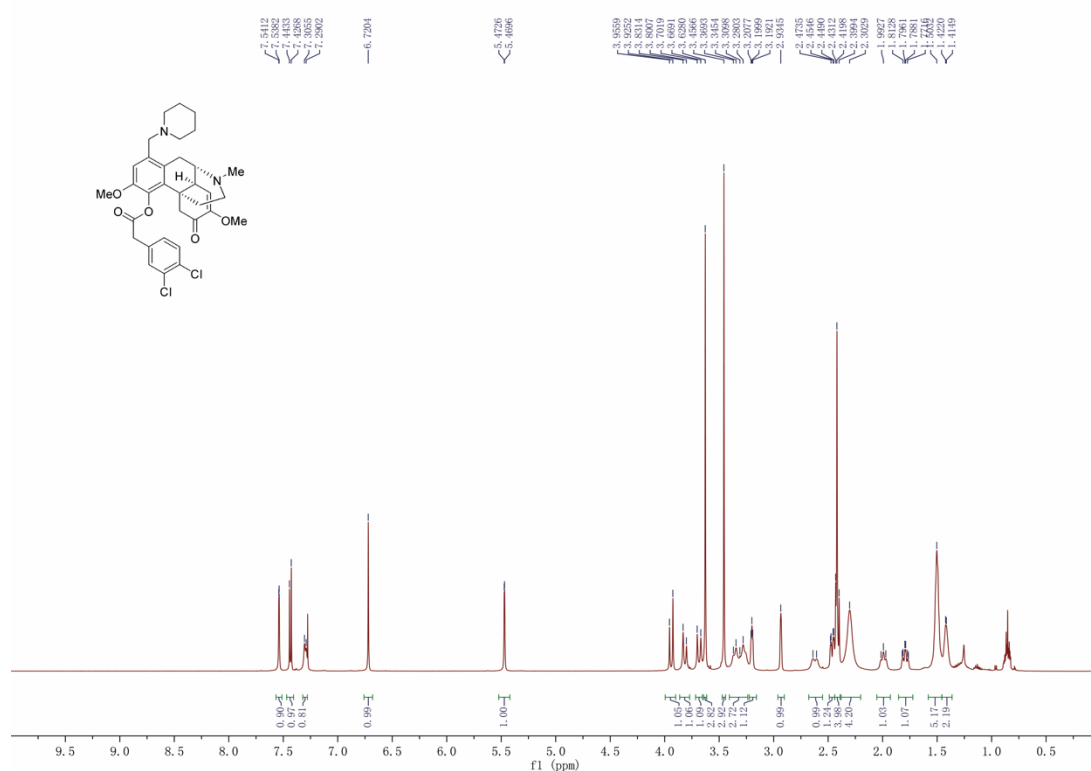

**Figure S19.**  $^1\text{H}$  NMR spectrum of compound **5j**.

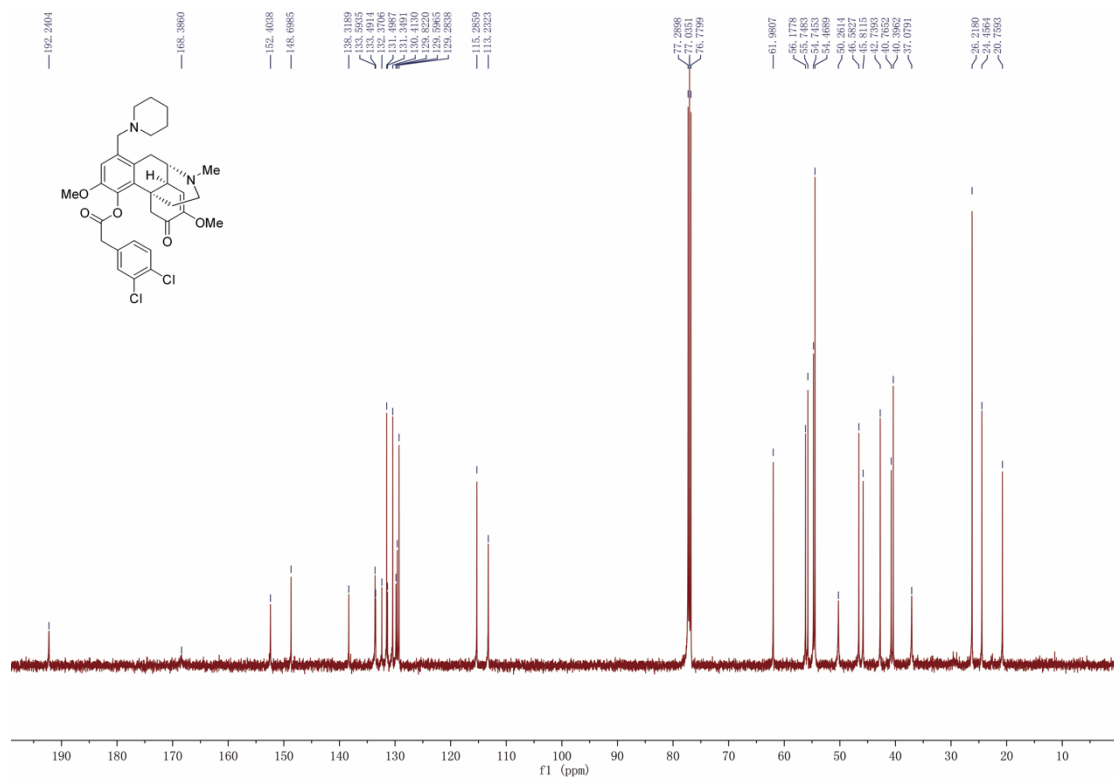

**Figure S20.**  $^{13}\text{C}$  NMR spectrum of compound **5j**.

# Supplementary material

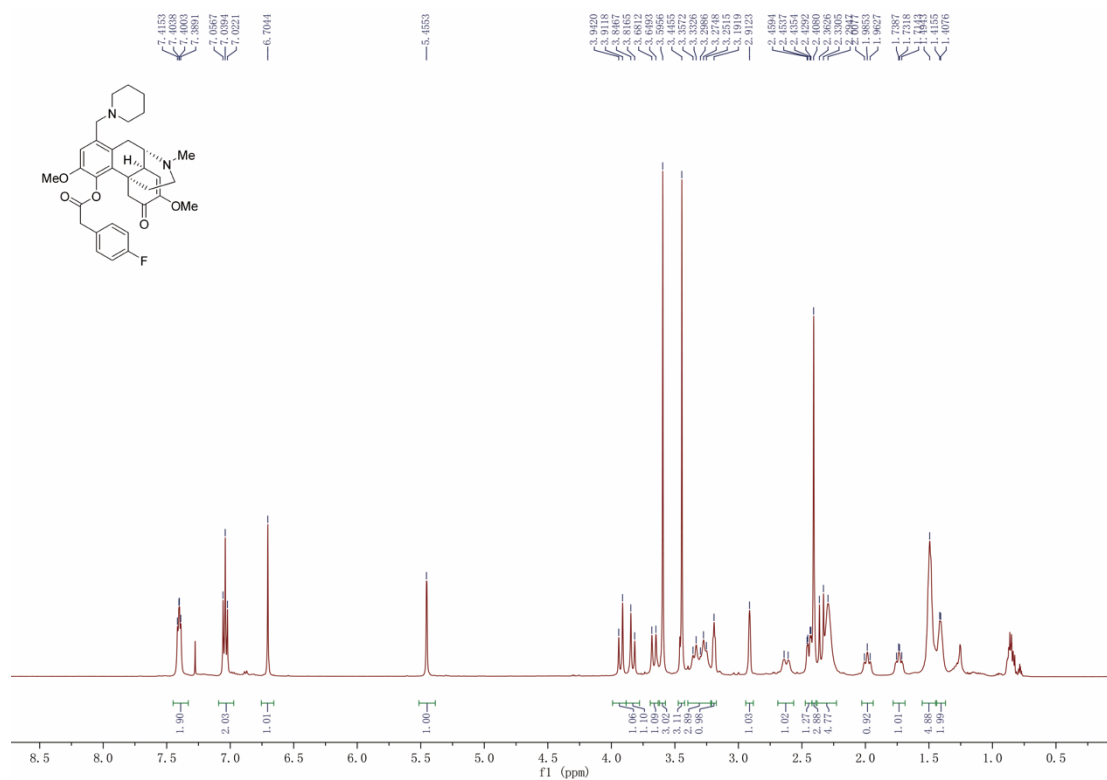

**Figure S21.** <sup>1</sup>H NMR spectrum of compound 5k.

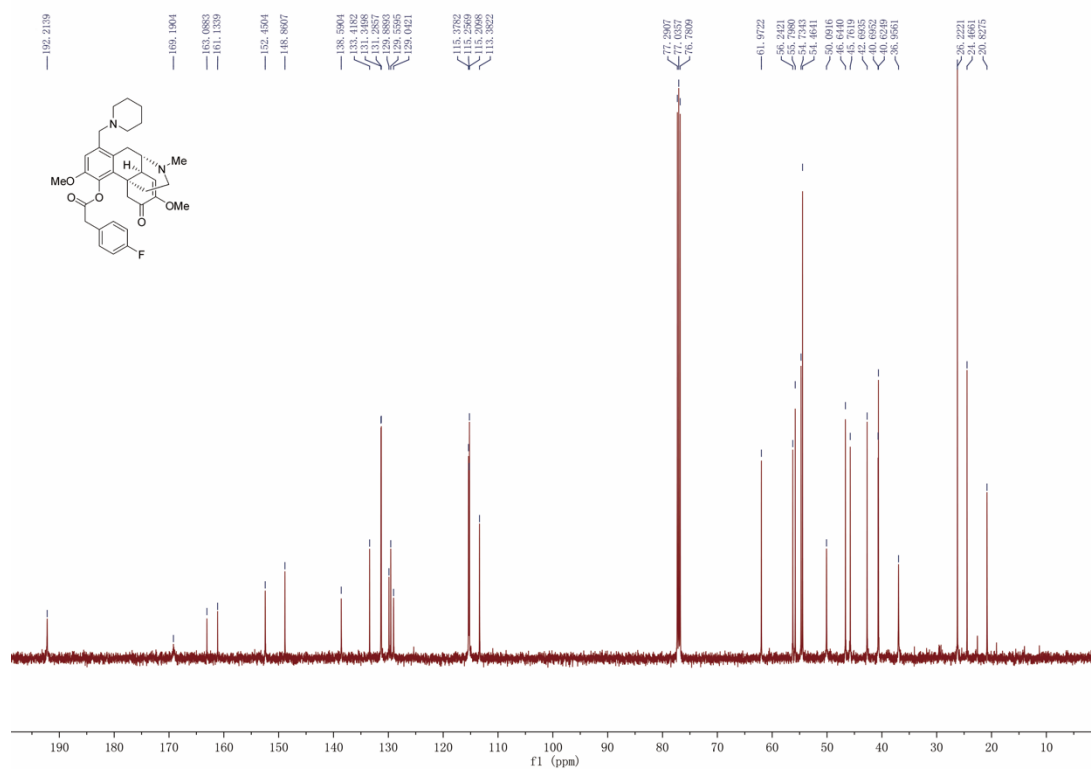

**Figure S22.** <sup>13</sup>C NMR spectrum of compound 5k.

# Supplementary material

LSJ\_1\_Pos\_Neg\_FullMS\_dMS2 #1205 RT: 3.42 AV: 1 NL: 5.94E9  
T: FTMS + c ESI Full ms [100.0000-1500.0000]

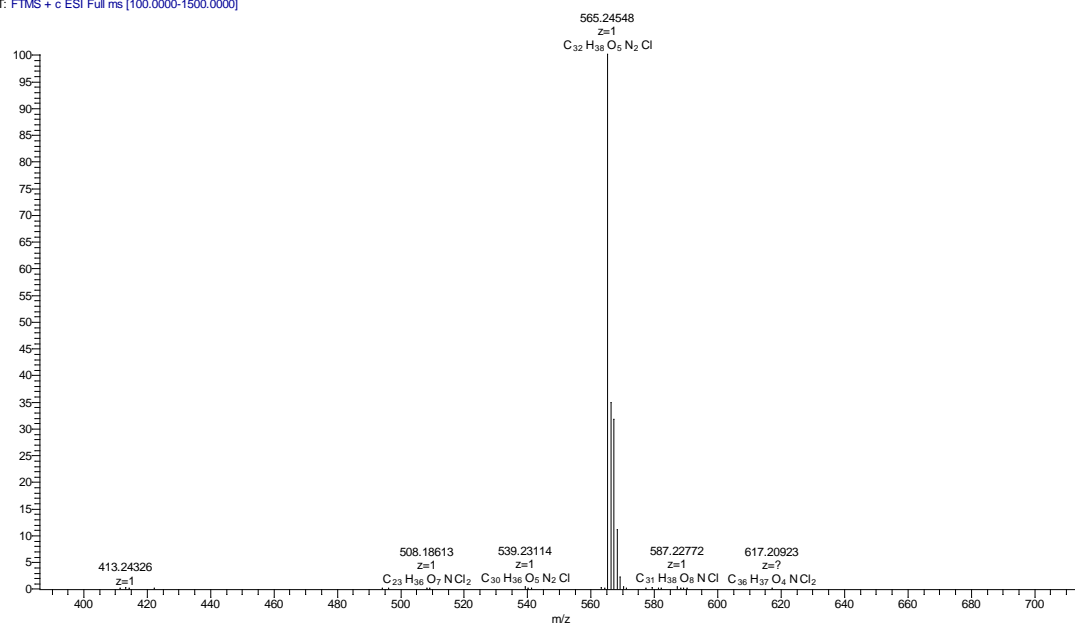

**Figure S23.** HRMS spectrum of compound 6a.

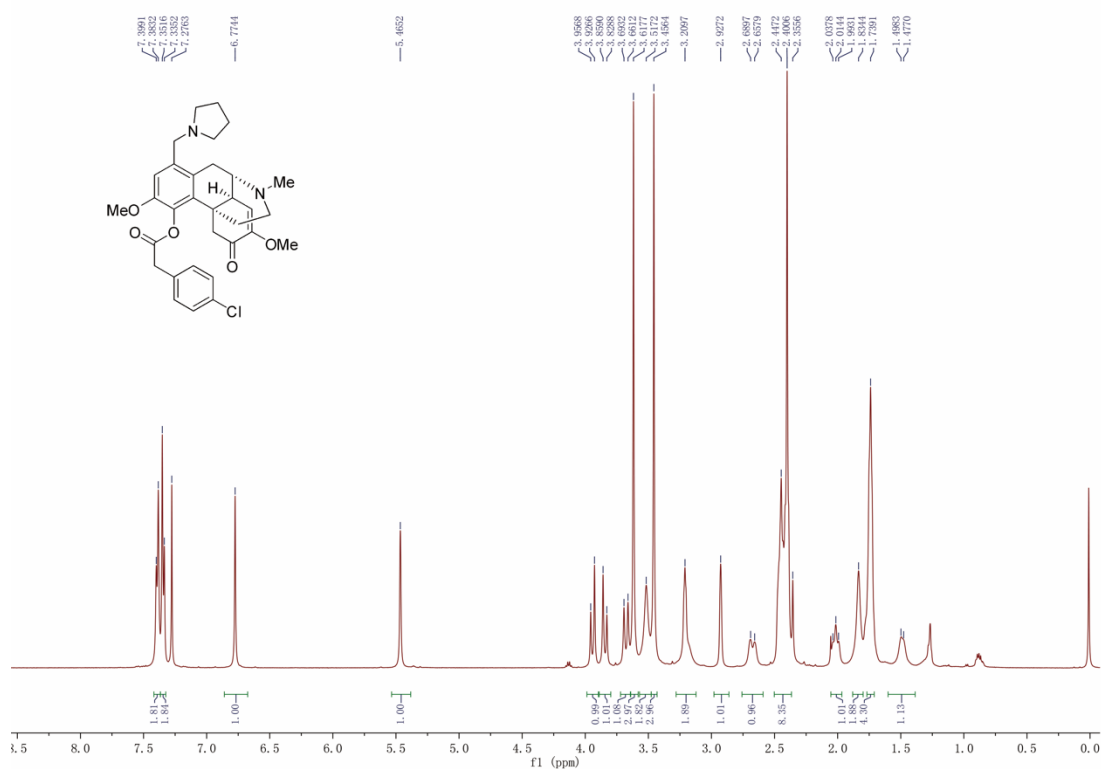

**Figure S24.** <sup>1</sup>H NMR spectrum of compound 6a.

## Supplementary material

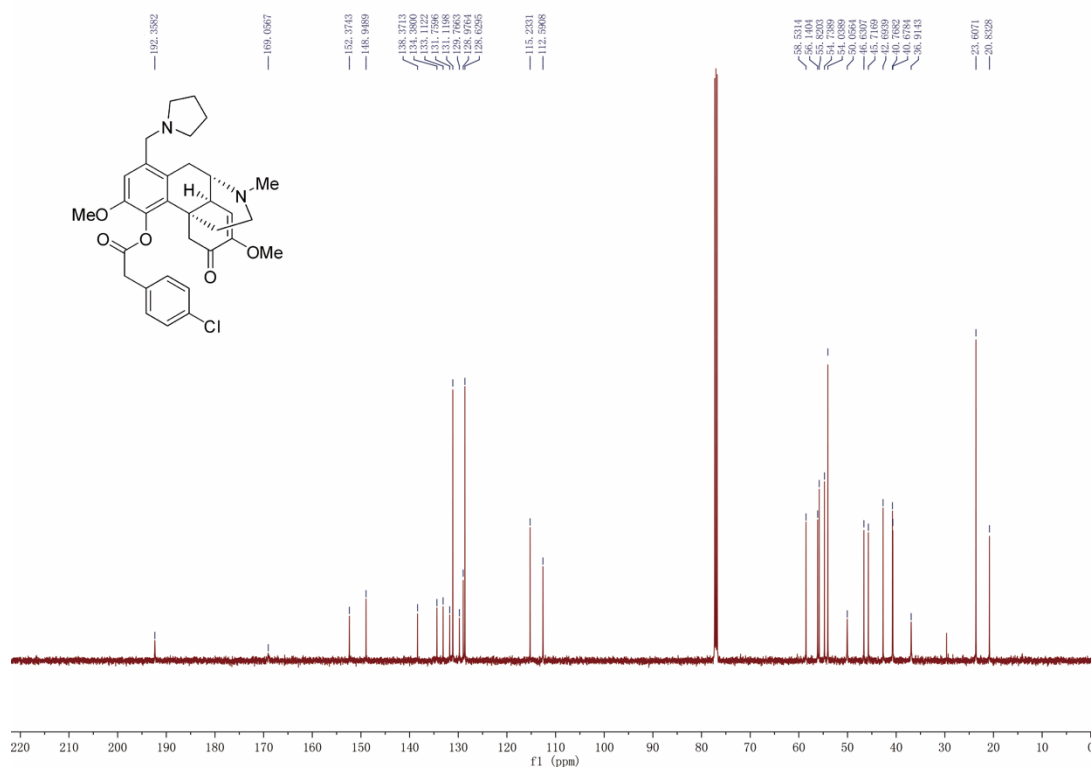

**Figure S25.**  $^{13}\text{C}$  NMR spectrum of compound **6a**.

LSJ\_2-Pos\_Neg\_FullMS\_ddMS2 #1205 RT: 3.41 AV: 1 NL: 4.43E9  
T: FTMS + c ESI Full ms [100.0000-1500.0000]

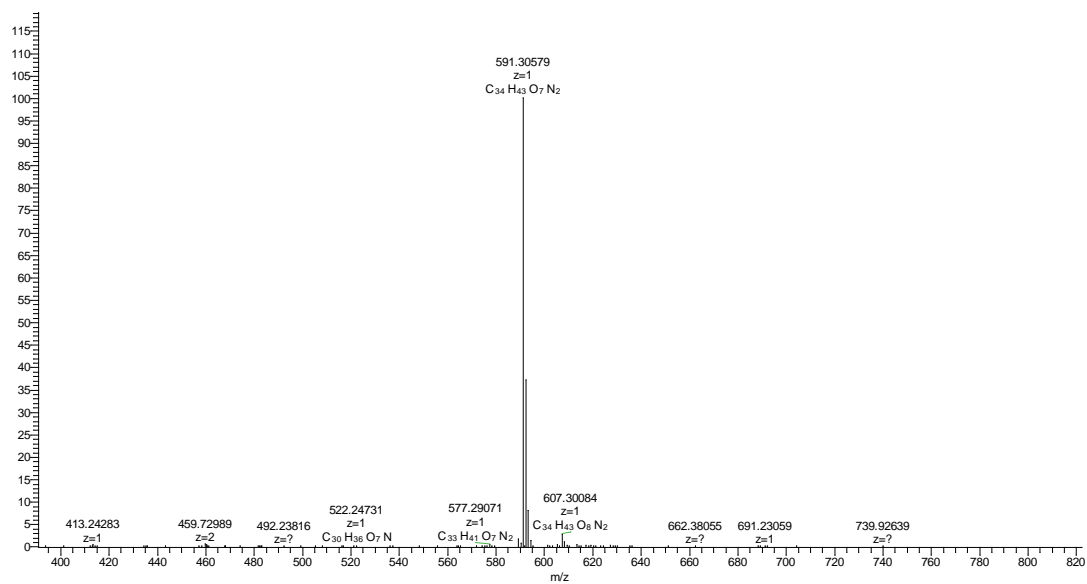

**Figure S26.** HRMS spectrum of compound **6b**.

# Supplementary material

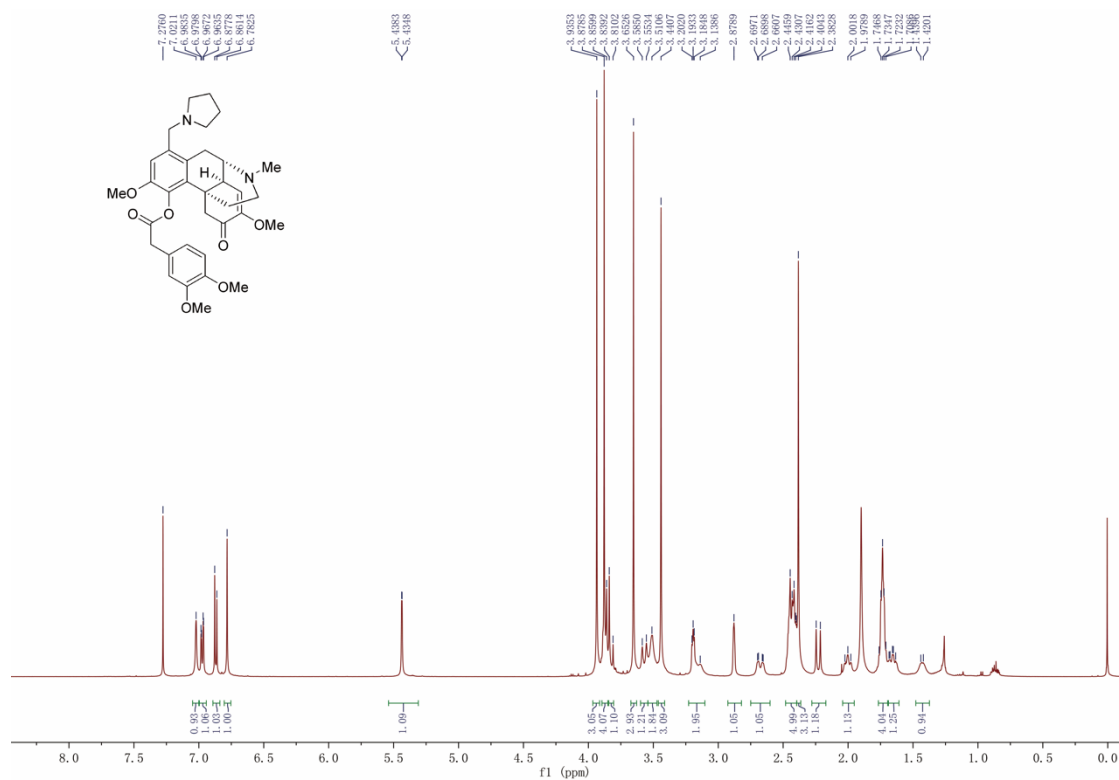



# Supplementary material

LSJ\_3\_Pos\_Neg\_FullMS\_dMS2 #1301 RT: 3.68 AV: 1 NL: 2.84E9  
T: FTMS + c ESI Full ms [100.0000-1500.0000]

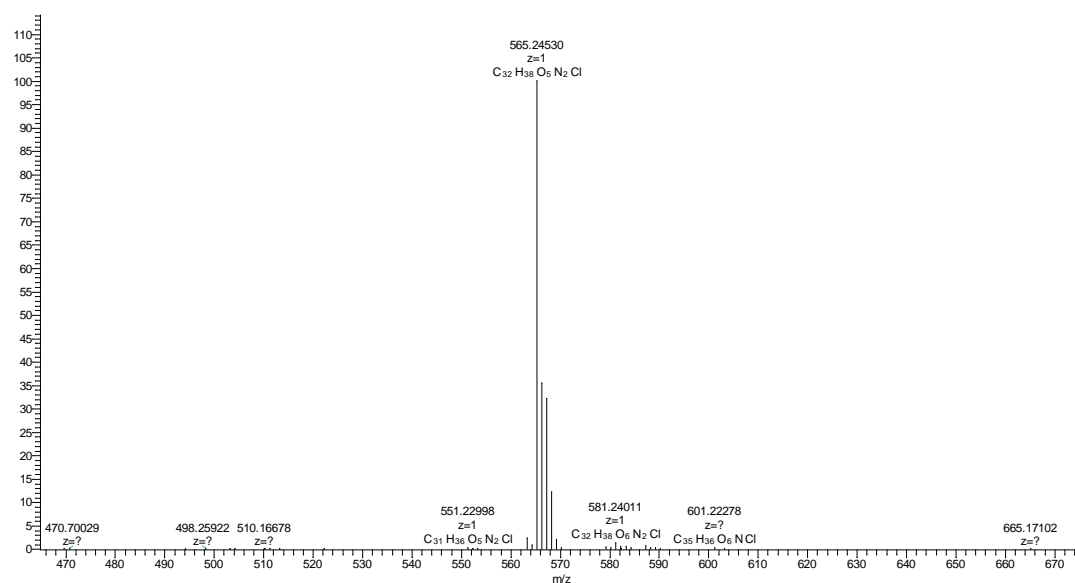

**Figure S29.** HRMS spectrum of compound 6c.

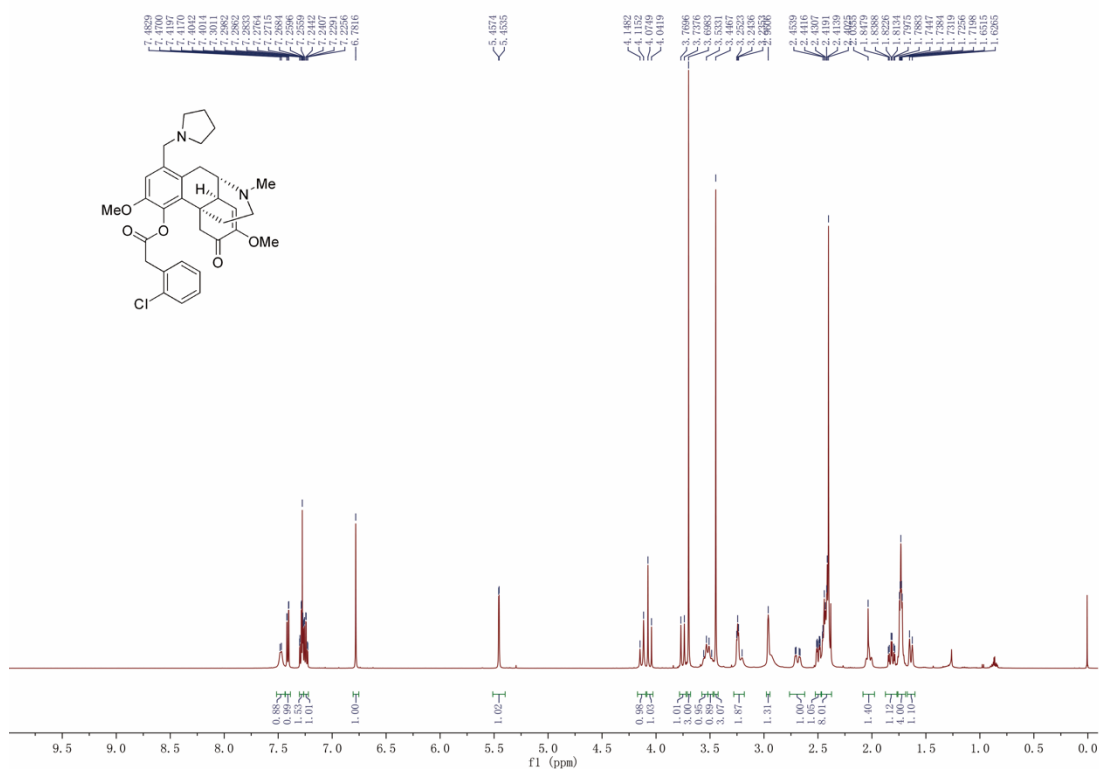

**Figure S30.** <sup>1</sup>H NMR spectrum of compound 6c.

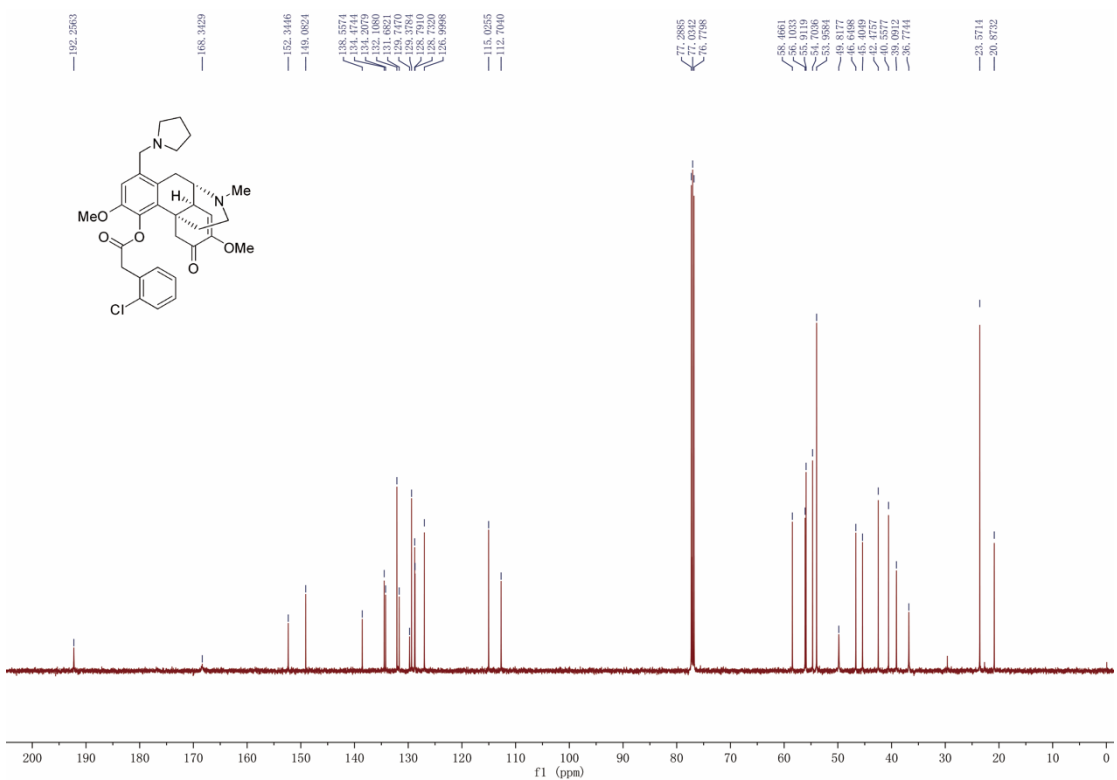

**Figure S31.**  $^{13}\text{C}$  NMR spectrum of compound **6c**.

LSJ\_4\_Pos\_Neg\_FullMS\_ddMS2 #1445 RT: 4.10 AV: 1 NL: 2.97E9  
T: FTMS + c ESI Full ms [100.0000-1500.0000]

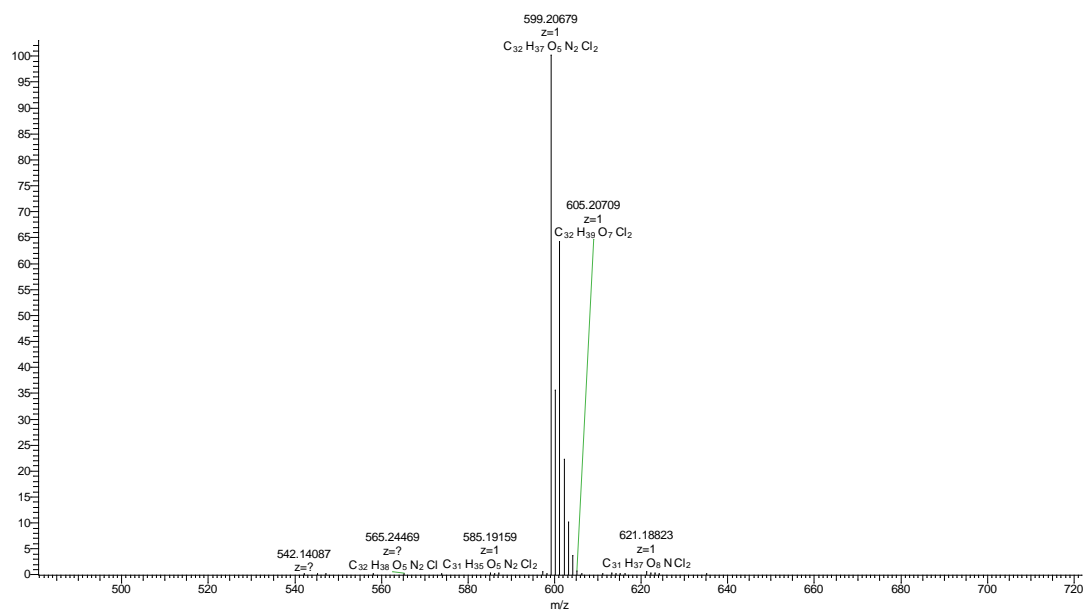

**Figure S32.** HRMS spectrum of compound **6d**.

# Supplementary material

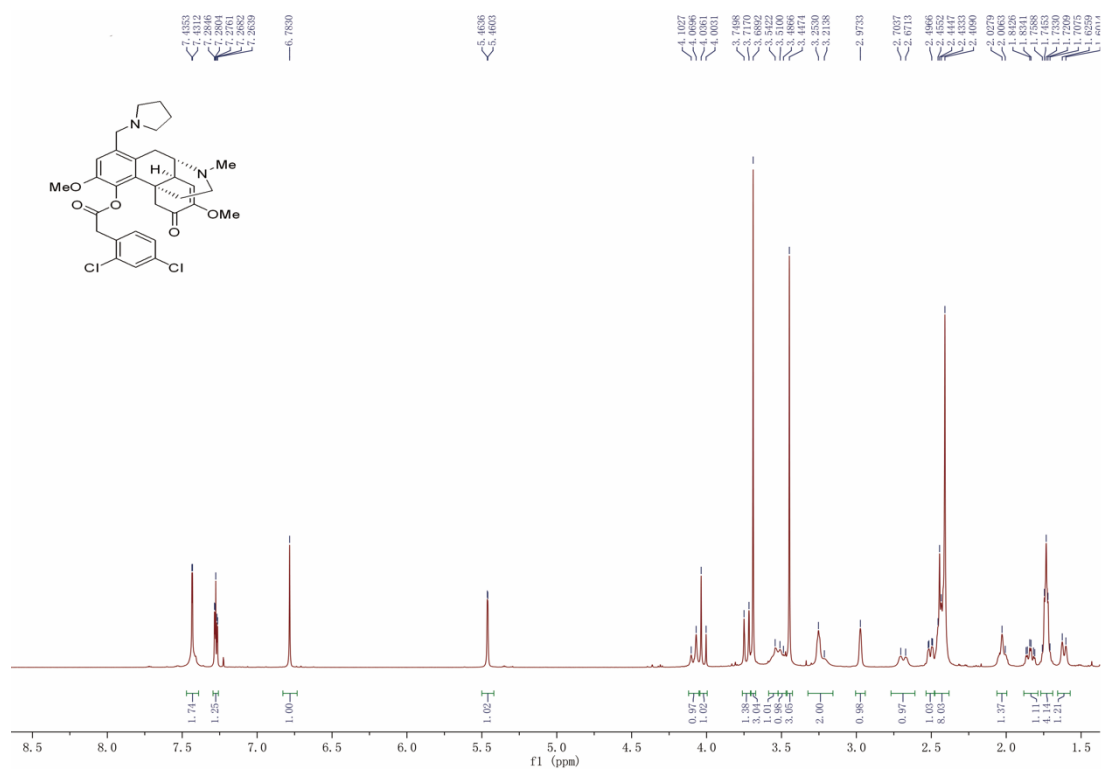

**Figure S33.** <sup>1</sup>H NMR spectrum of compound **6d**.

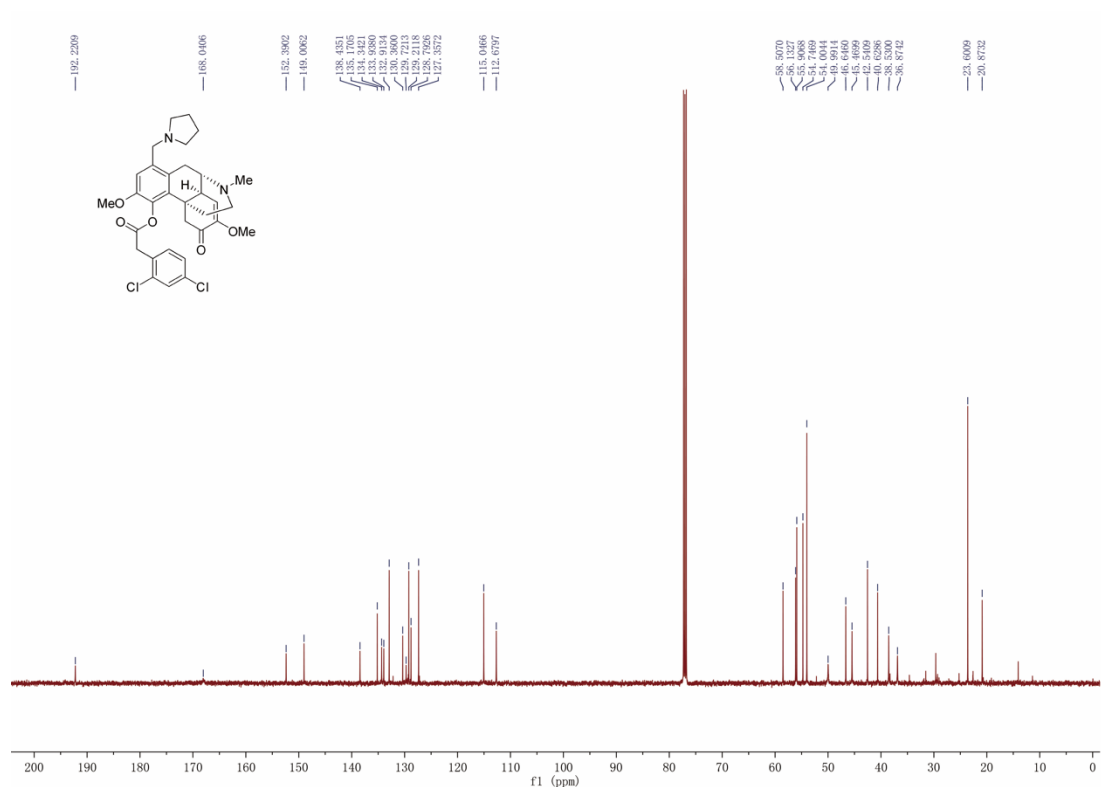

**Figure S34.** <sup>13</sup>C NMR spectrum of compound **6d**.

# Supplementary material

LSJ\_5\_Pos\_Neg\_FullMS\_dtdMS2 #1373 RT: 3.89 AV: 1 NL: 1.72E9  
T: FTMS + c ESI Full ms [100.0000-1500.0000]

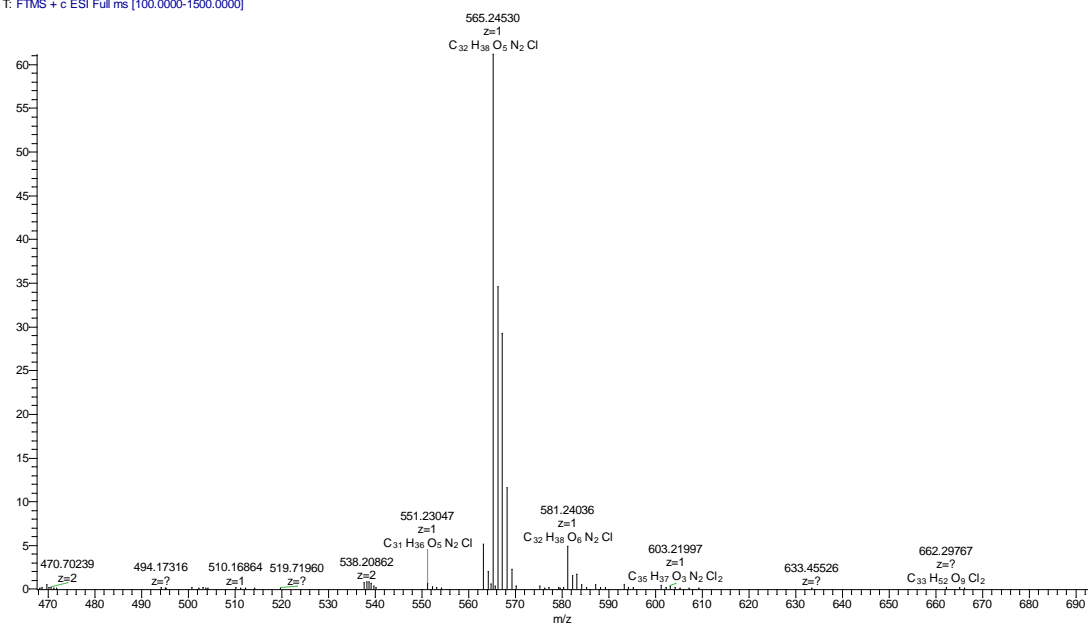

Figure S35. HRMS spectrum of compound 6e.

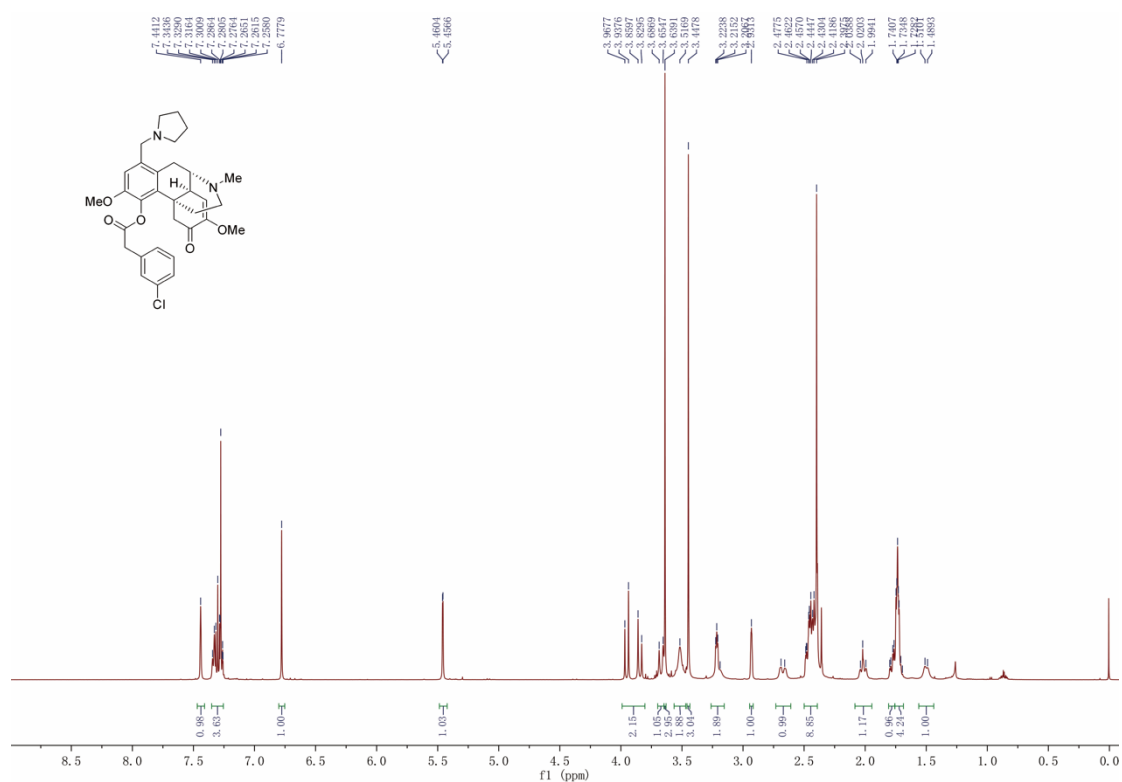

Figure S36. <sup>1</sup>H NMR spectrum of compound 6e.

## Supplementary material

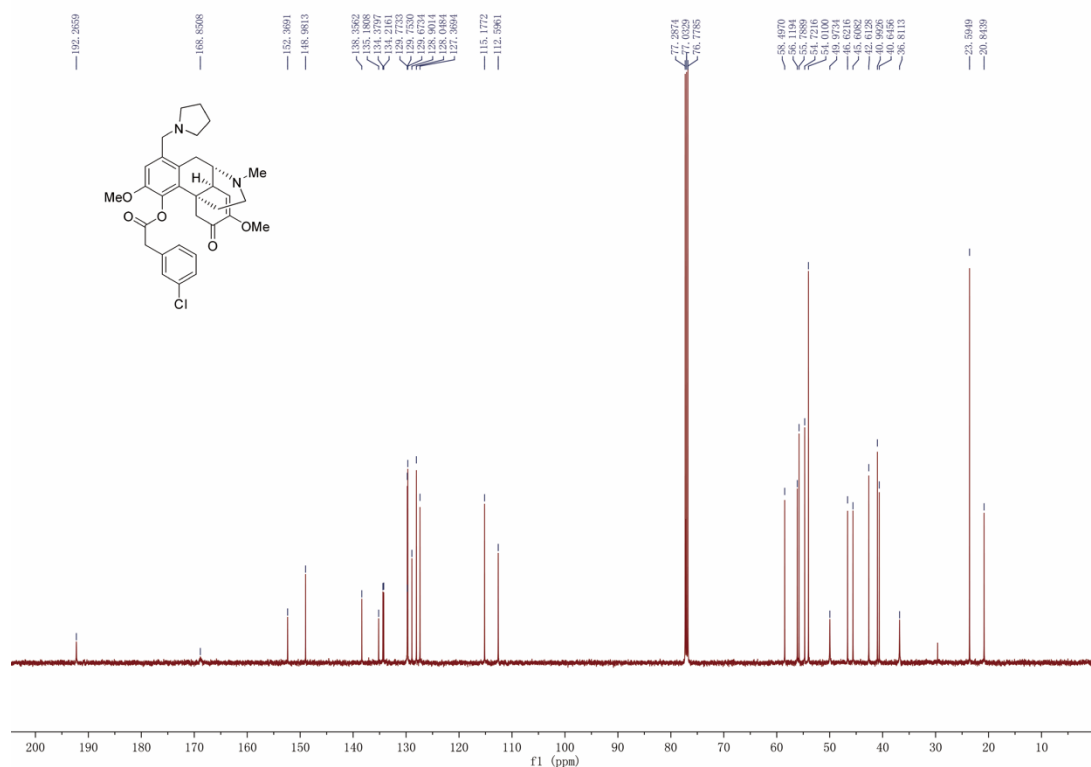

**Figure S37.** <sup>13</sup>C NMR spectrum of compound 6e.

LSJ\_6\_Pos\_Neg\_FullMS\_ddMS2 #1289 RT: 3.68 AV: 1 NL: 3.98E9  
T: FTMS + c ESI Full ms [100.0000-1500.0000]

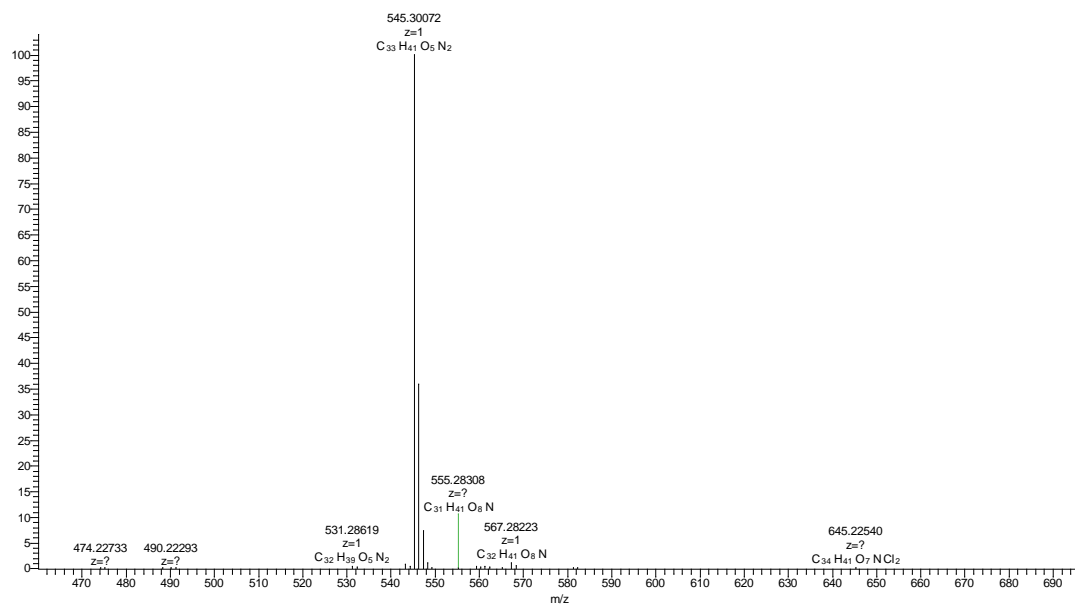

**Figure S38.** HRMS spectrum of compound 6f.

# Supplementary material

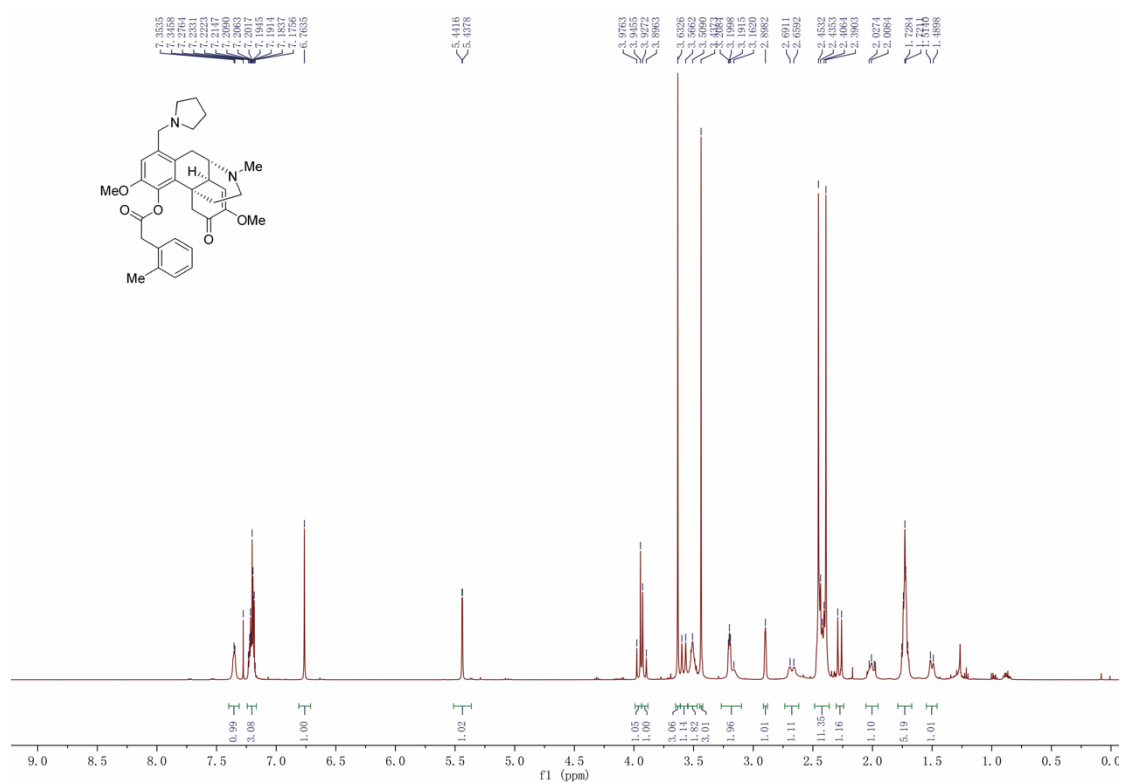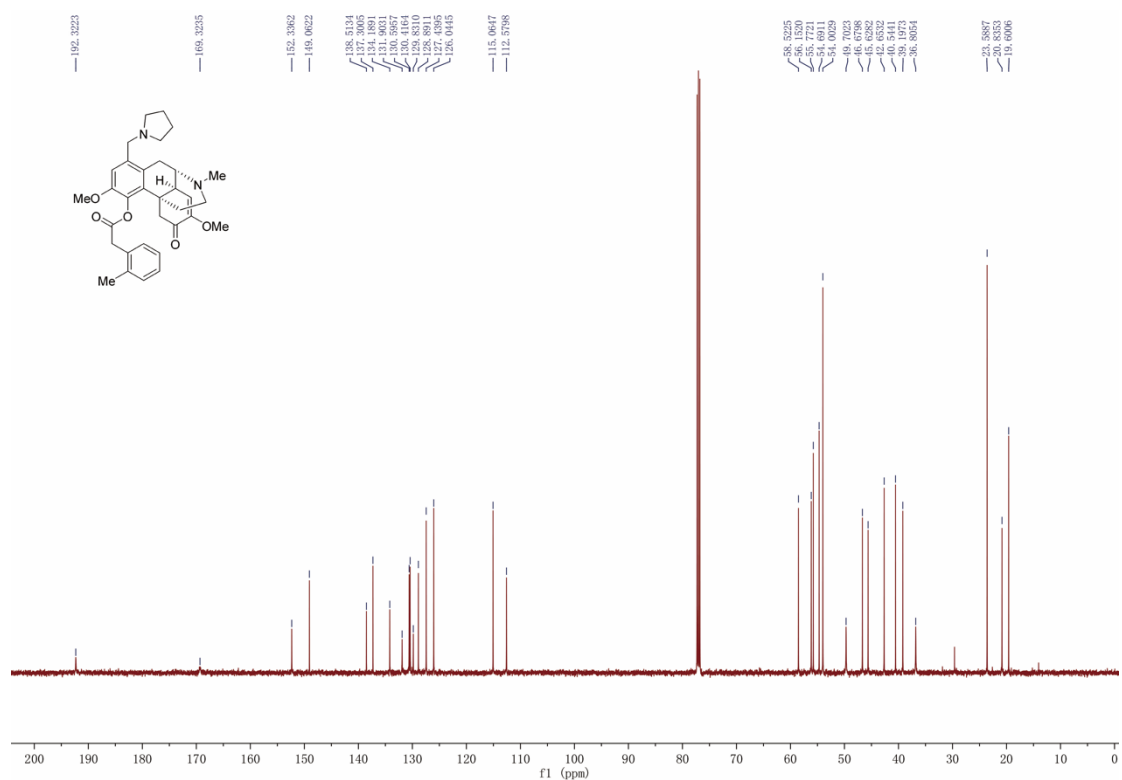

# Supplementary material

LSJ\_7\_Pos\_Neg\_FullMS\_dMS2 #1421 RT: 4.07 AV: 1 NL: 3.53E9  
T: FTMS + c ESI Full ms [100.0000-1500.0000]

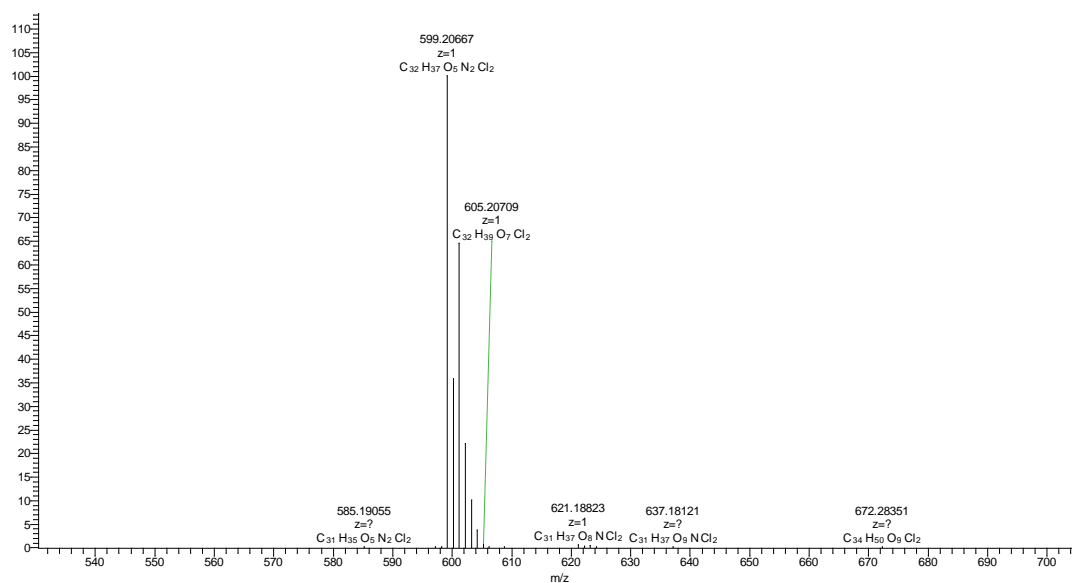

**Figure S41.** HRMS spectrum of compound **6g**.

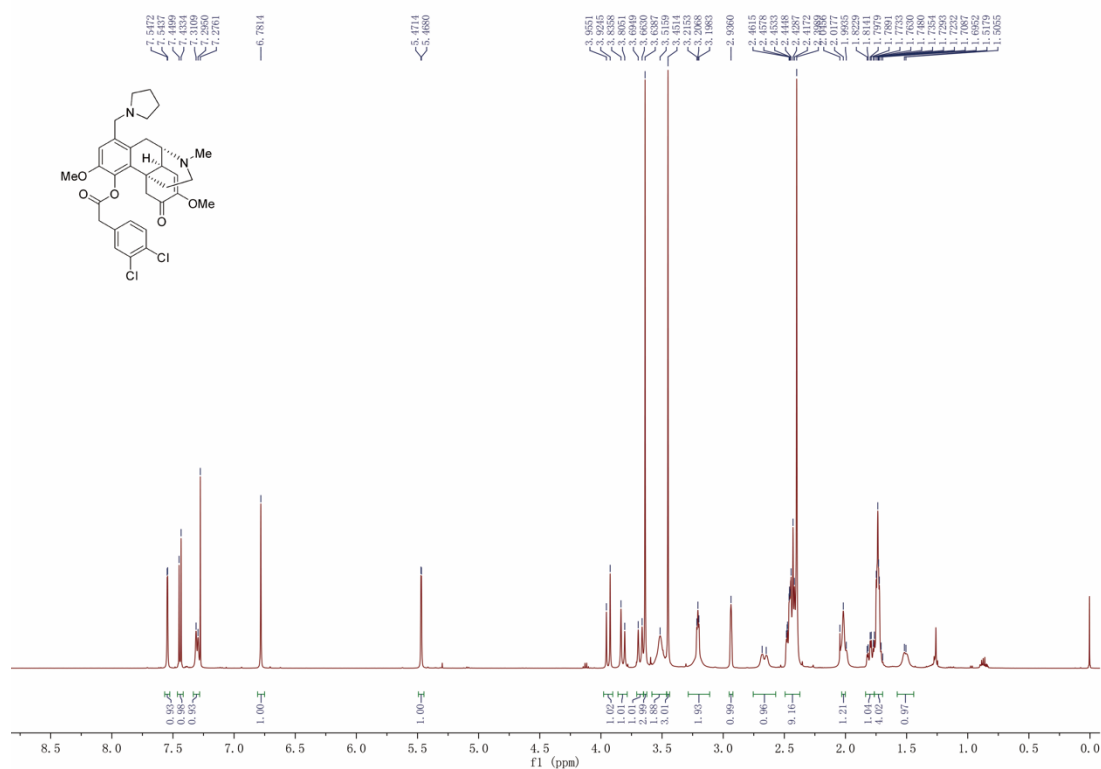

**Figure S42.** <sup>1</sup>H NMR spectrum of compound **6g**.

## Supplementary material

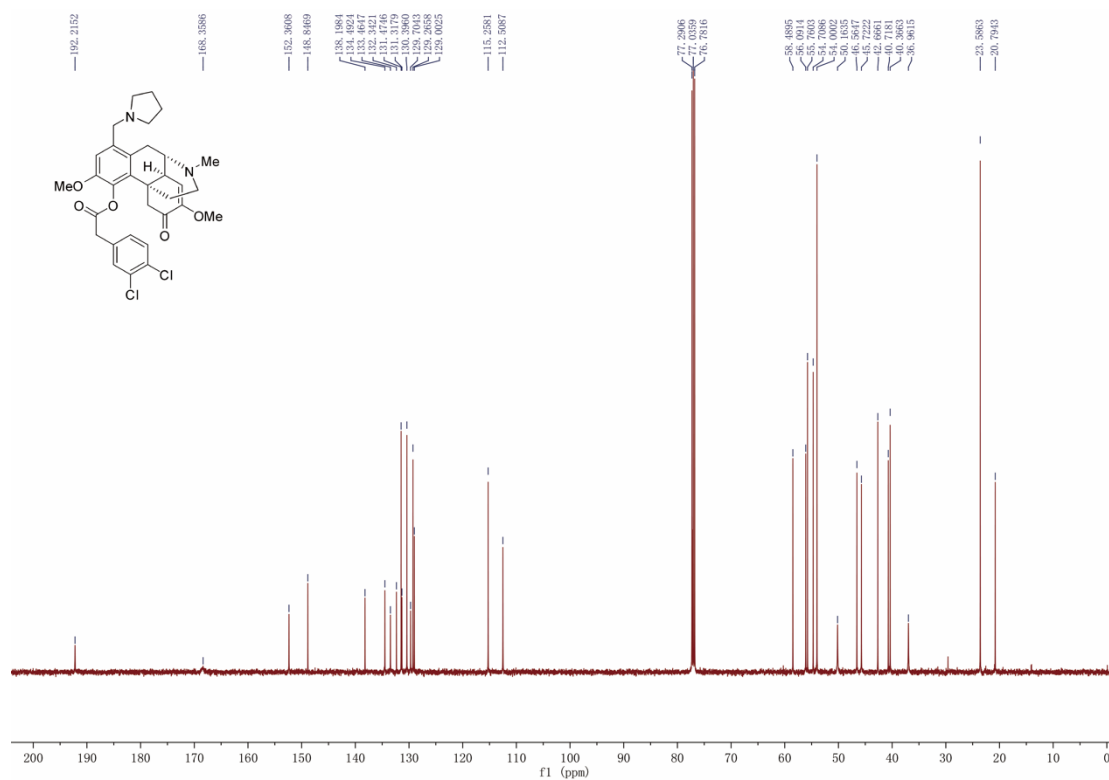

**Figure S43.** <sup>13</sup>C NMR spectrum of compound **6g**.

LSJ\_8\_Pos\_Neg\_FullMS\_ddMS2 #1133 RT: 3.21 AV: 1 NL: 5.66E9  
T: FTMS + c ESI Full ms [100.0000-1500.0000]

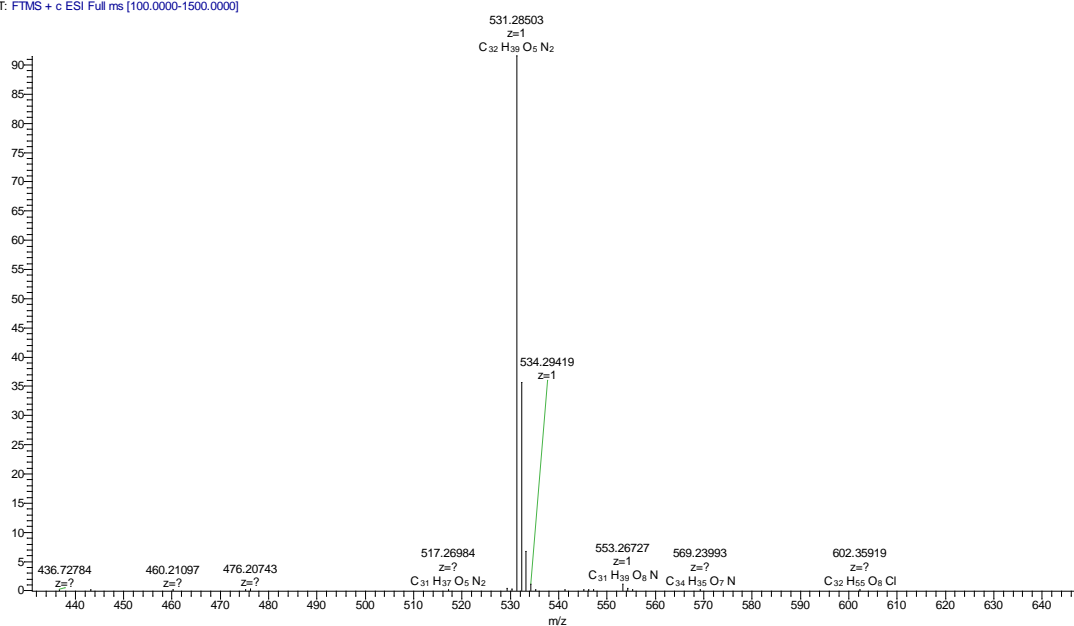

**Figure S44.** HRMS spectrum of compound **6h**.



# Supplementary material

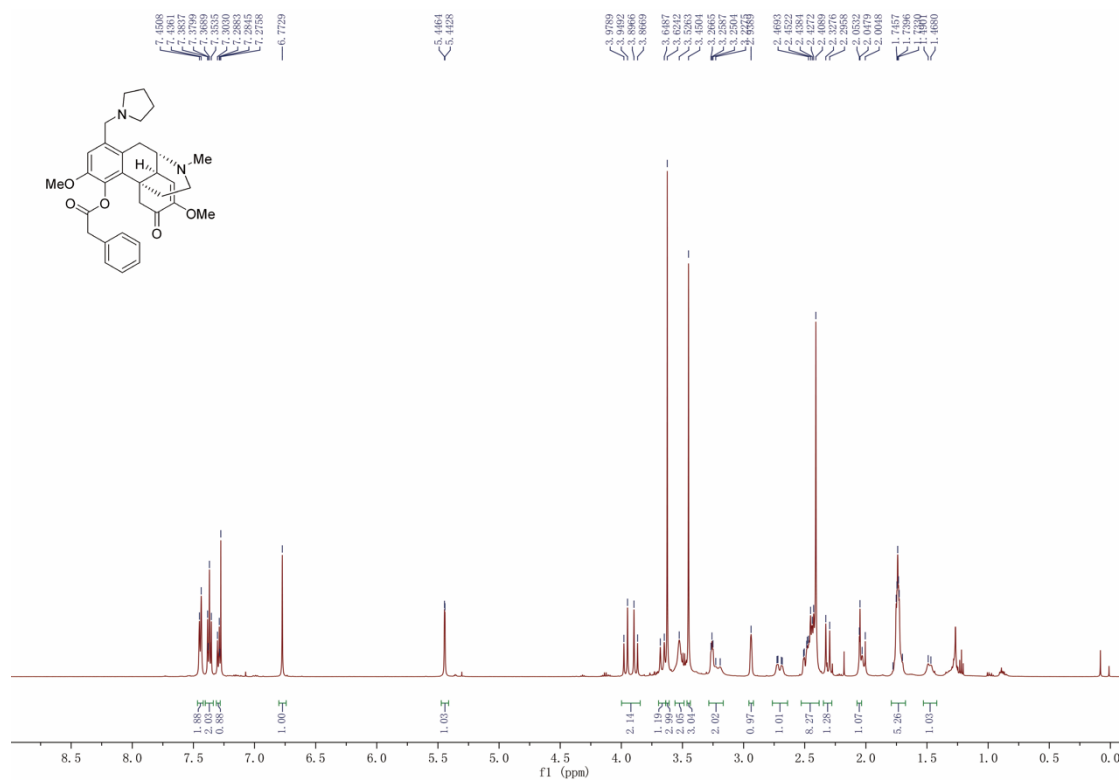

**Figure S45.** <sup>1</sup>H NMR spectrum of compound **6h**.

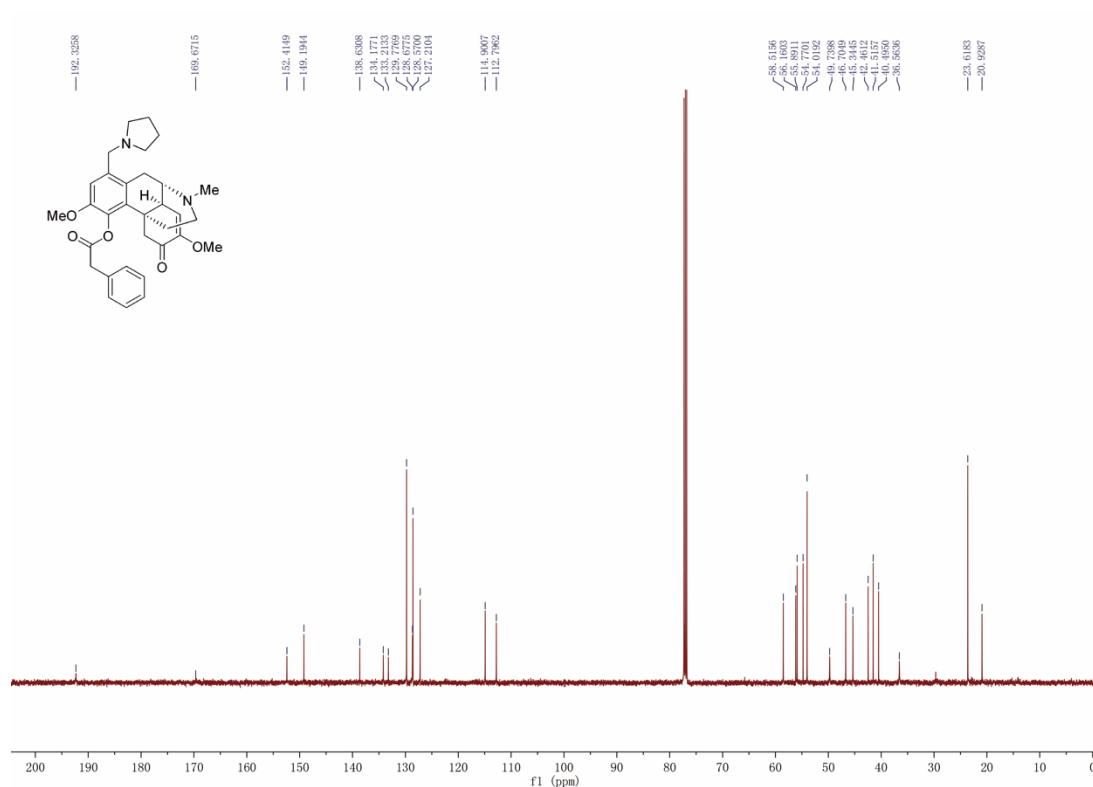

**Figure S46.** <sup>13</sup>C NMR spectrum of compound **6h**.

# Supplementary material

LSJ\_9\_Pos\_Neg\_FullMS\_dMS2 #1181 RT: 3.34 AV: 1 NL: 5.51E9  
T: FTMS + c ESI Full ms [100.0000-1500.0000]

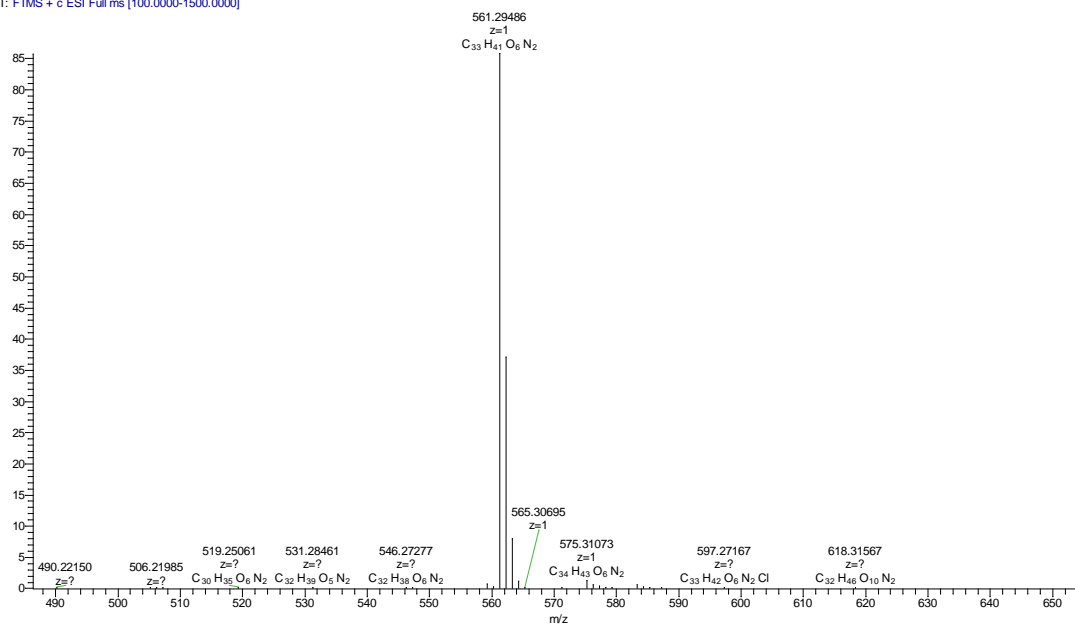

**Figure S47.** HRMS spectrum of compound **6i**.

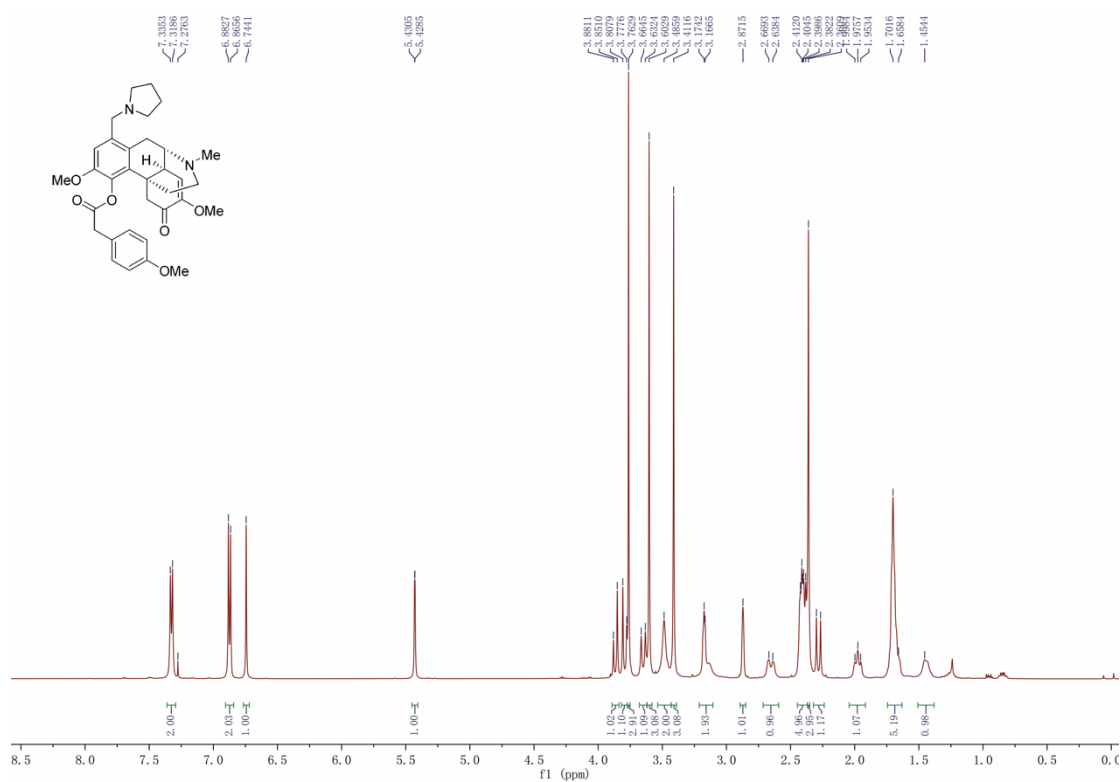

**Figure S48.** <sup>1</sup>H NMR spectrum of compound **6i**.

## Supplementary material

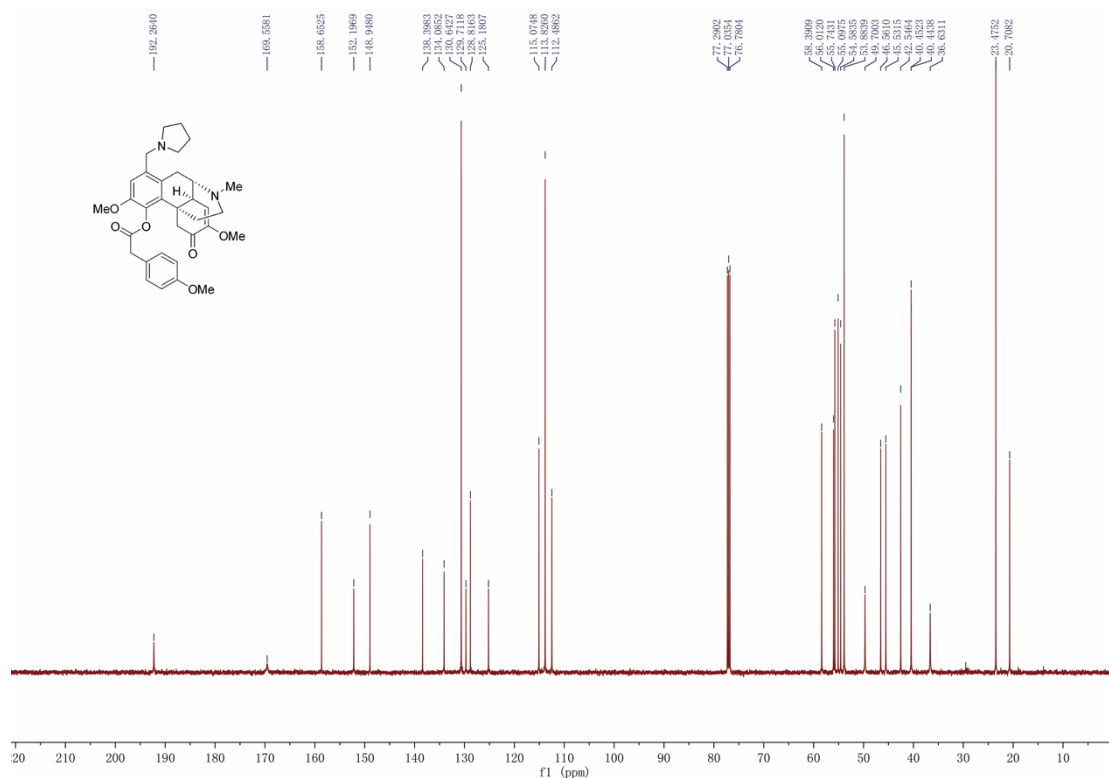

**Figure S49.**  $^{13}\text{C}$  NMR spectrum of compound **6i**.

LSJ\_10\_Pos\_Neg\_FullMS2 #1121 RT: 3.14 AV: 1 NL: 8.47E9  
T: FTMS + c ESI Full ms [100.0000-1500.0000]

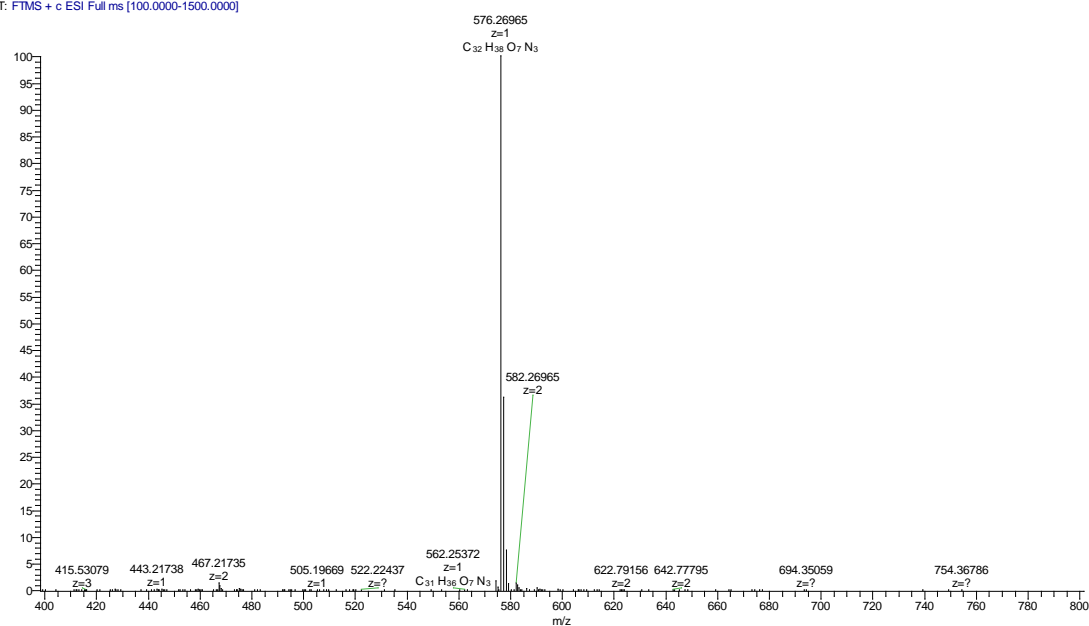

**Figure S50.** HRMS spectrum of compound **6j**.

# Supplementary material

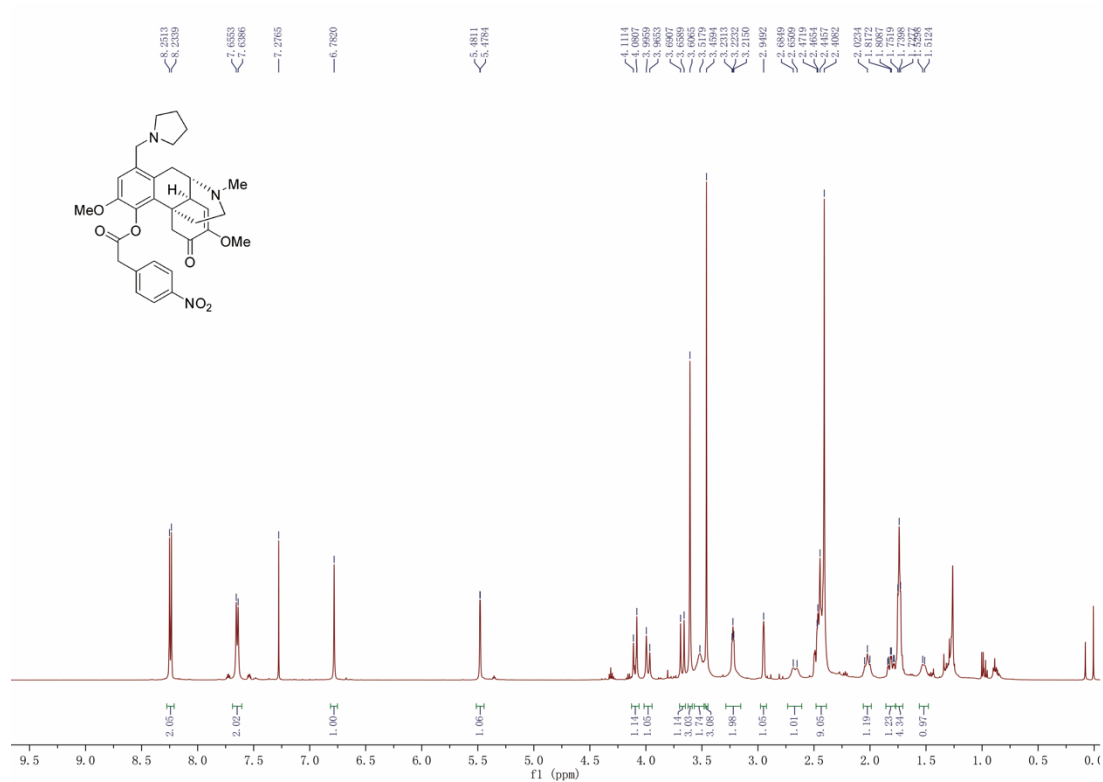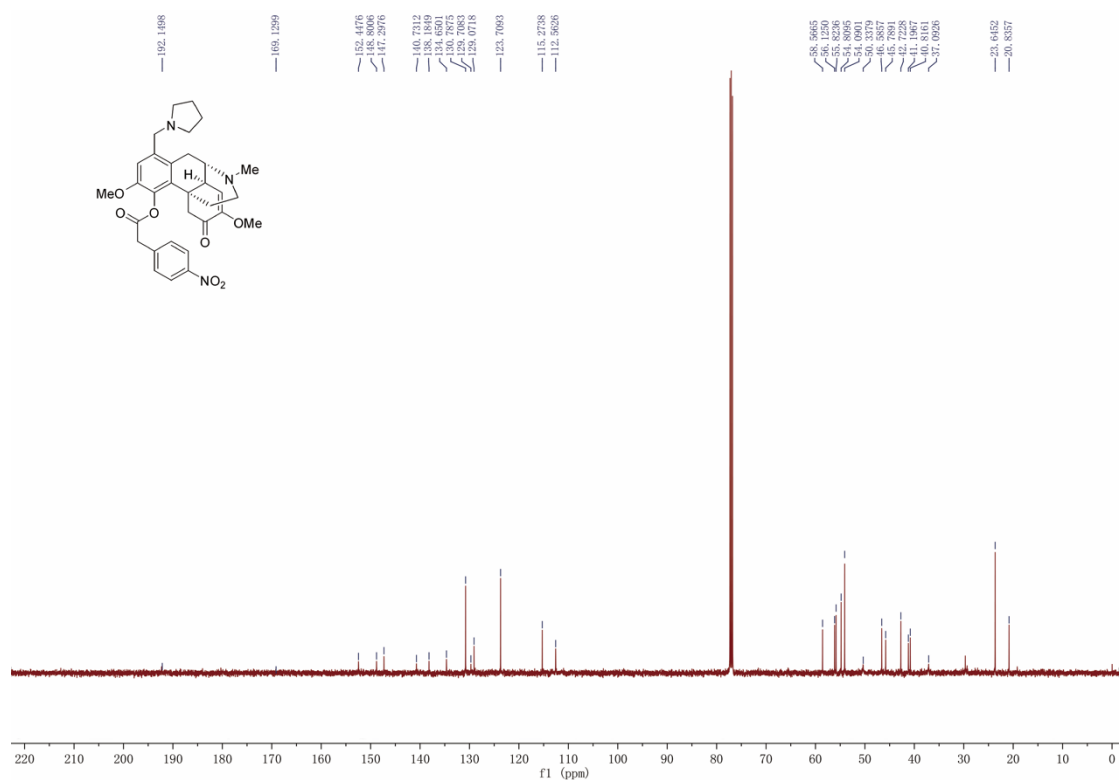

# Supplementary material

LSJ\_11\_1Pos\_Neg\_FullMS\_ddMS2 #1253 RT: 3.58 AV: 1 NL: 3.92E9  
T: FTMS + c ESI Full ms [100.0000-1500.0000]

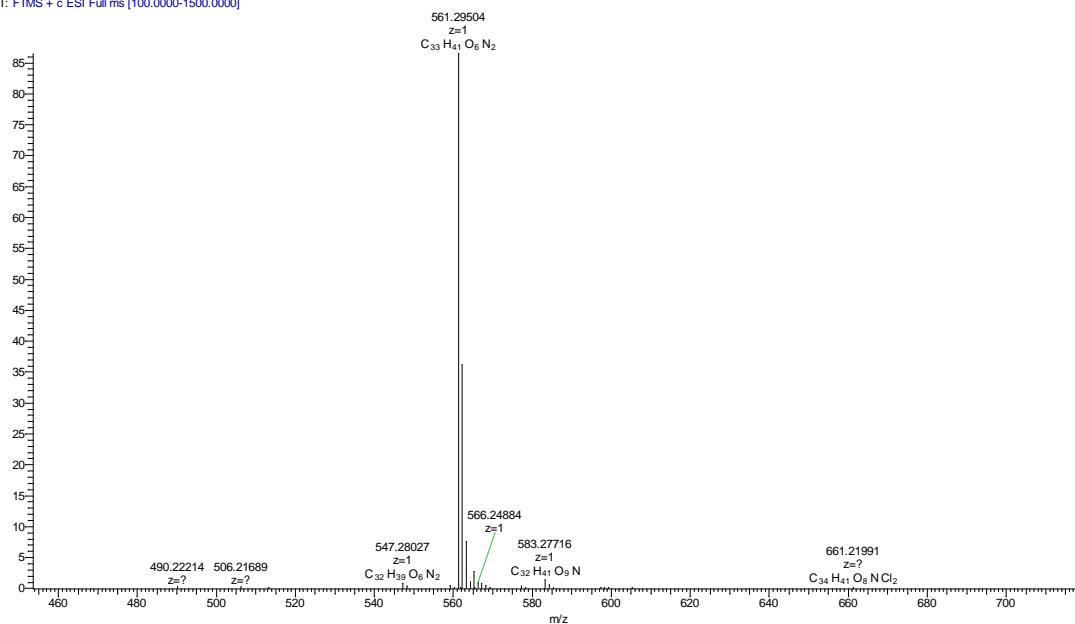

**Figure S53.** HRMS spectrum of compound **6k**.

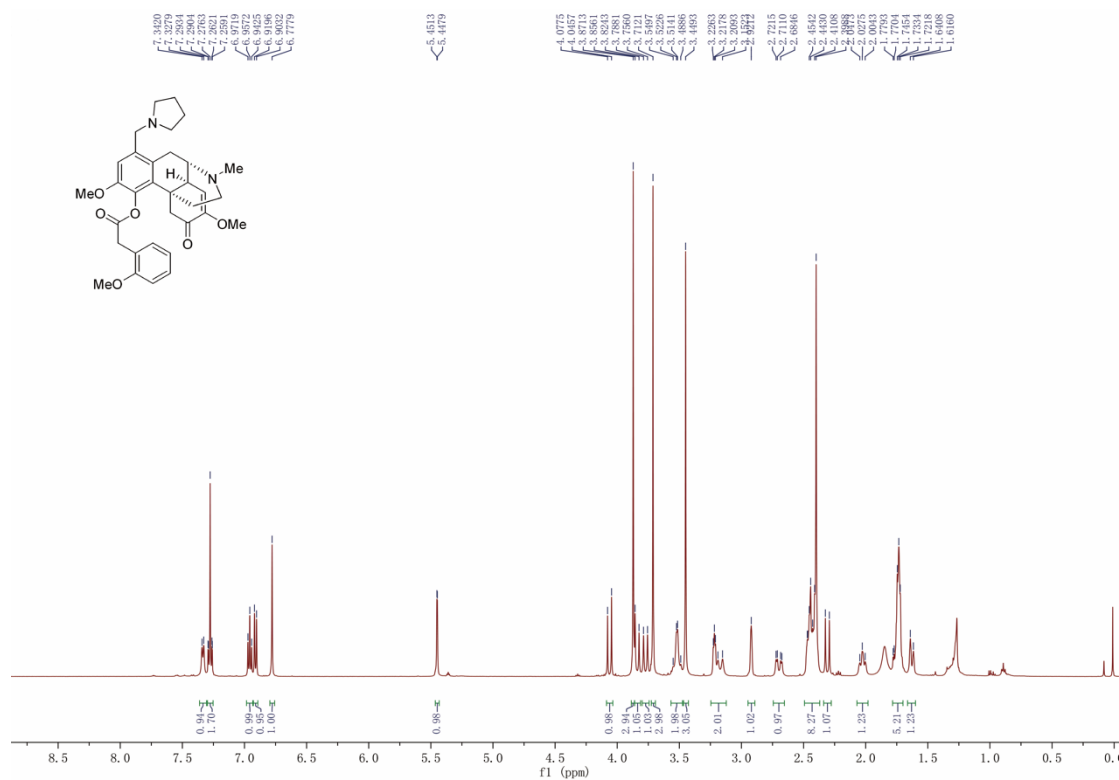

**Figure S54.**  $^1H$  NMR spectrum of compound **6k**.

## Supplementary material

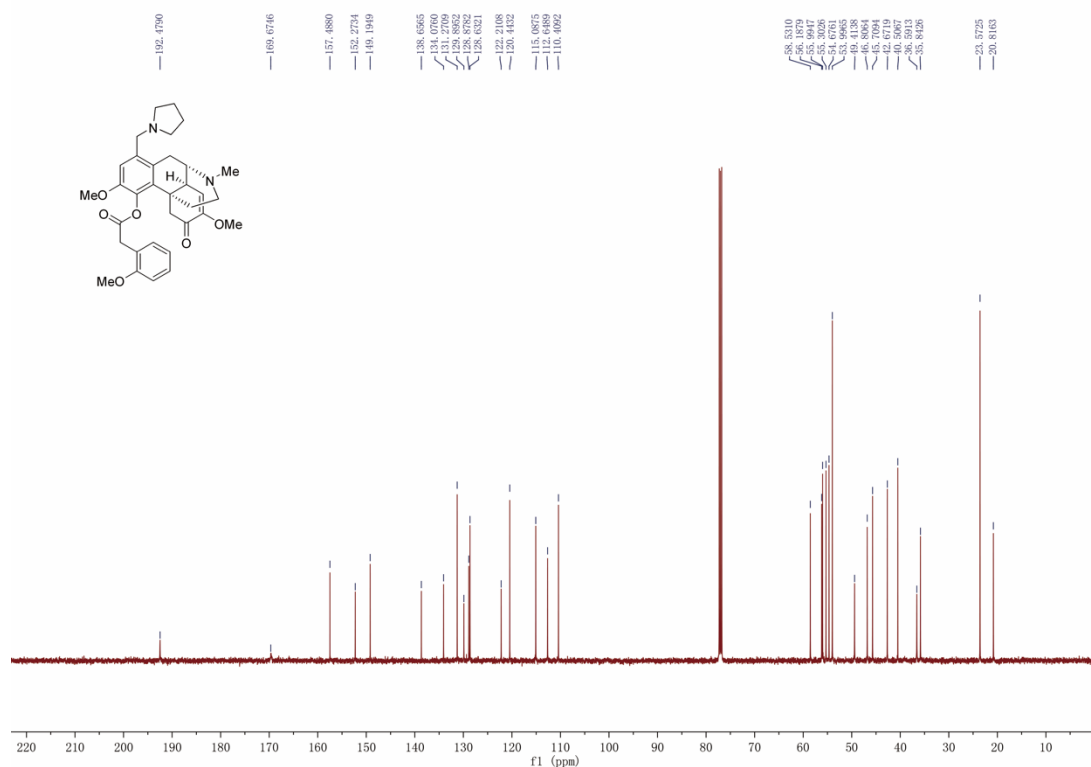

**Figure S55.**  $^{13}\text{C}$  NMR spectrum of compound **6k**.

LSJ\_12\_Pos\_Neg\_FullMS2 #1121 RT: 3.21 AV: 1 NL: 5.80E9  
T: FTMS + c ESI Full ms [100.0000-1500.0000]

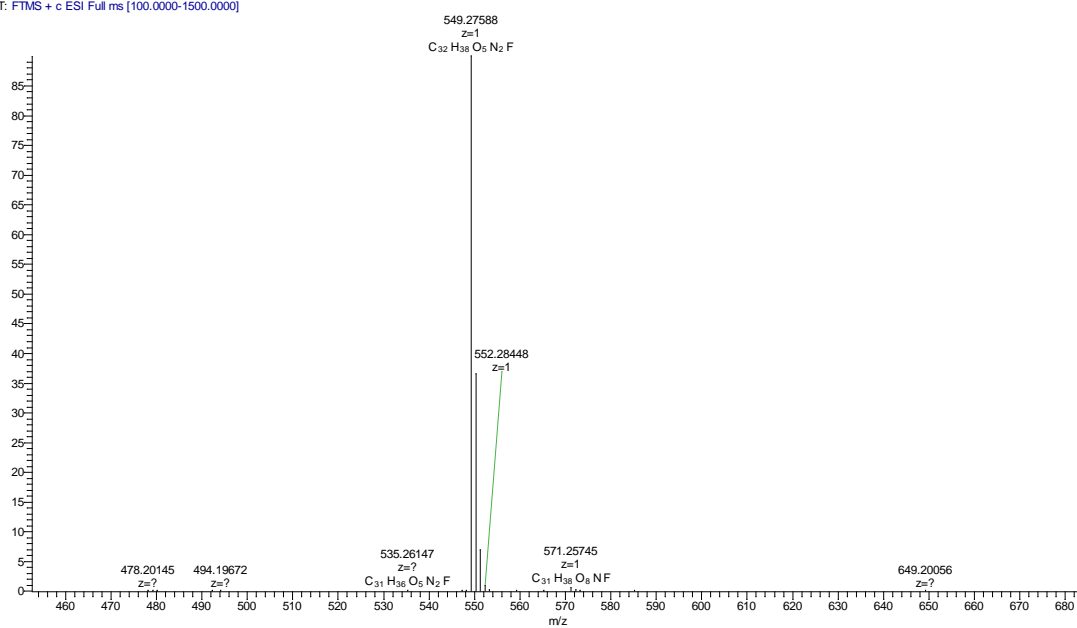

**Figure S56.** HRMS spectrum of compound **6l**.

# Supplementary material

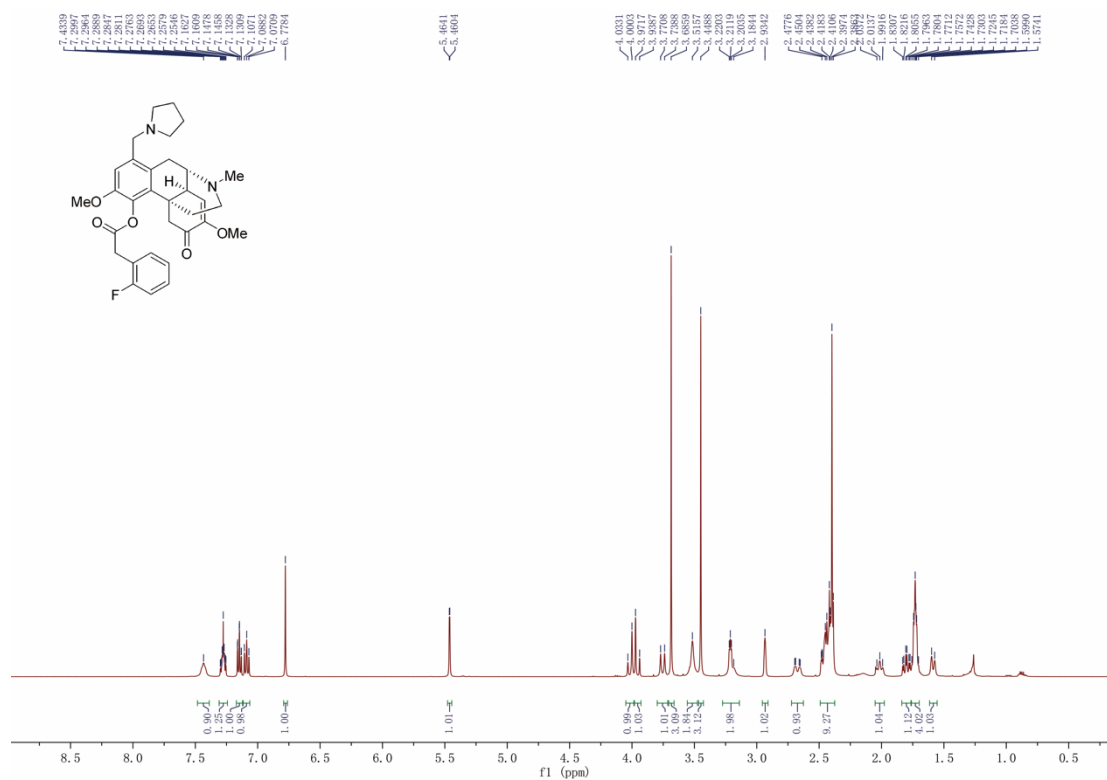

**Figure S57.**  $^1\text{H}$  NMR spectrum of compound **6l**.

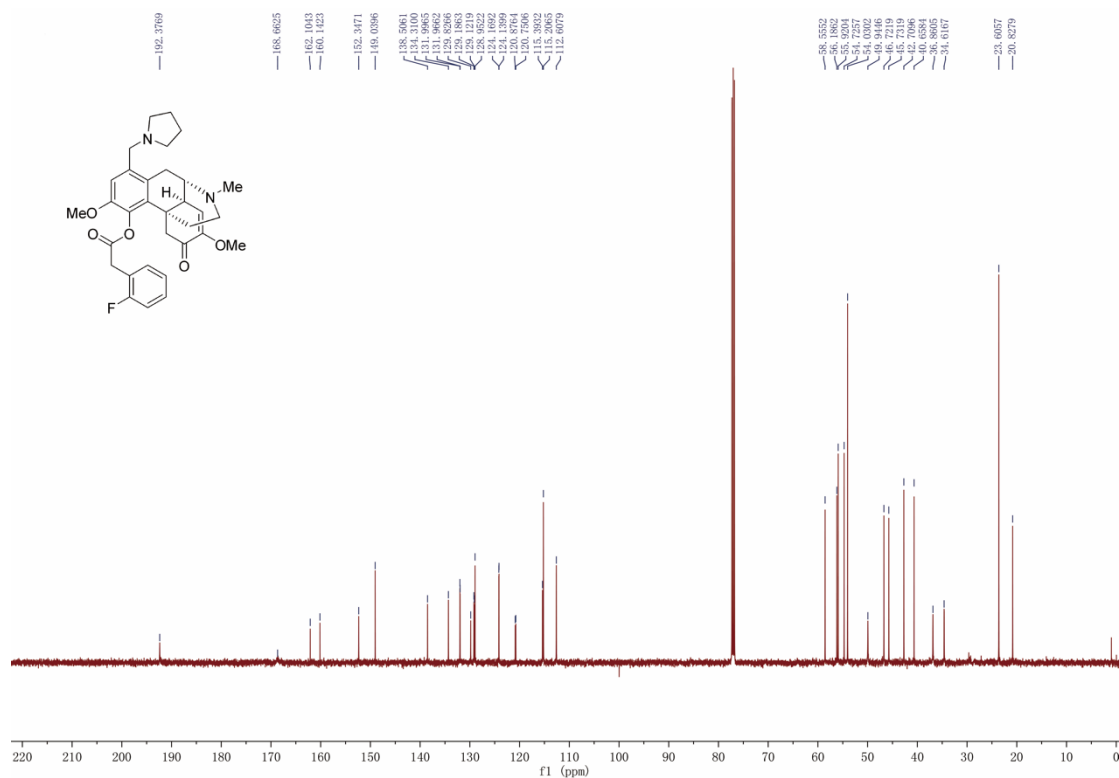

**Figure S58.**  $^{13}\text{C}$  NMR spectrum of compound **6l**.

## Supplementary material

**Table S1.** Mean  $\pm$  SD values of growth inhibition ratios at 2.5  $\mu$ m drug concentration.

| Comp.     | Hela              | MCF-7            | SW480             | A549             | Hek293           |
|-----------|-------------------|------------------|-------------------|------------------|------------------|
| <b>6a</b> | 7.81 $\pm$ 5.42   | 0.00             | 12.92 $\pm$ 6.52  | 3.41 $\pm$ 0.82  | 17.92 $\pm$ 1.86 |
| <b>6b</b> | 2.03 $\pm$ 2.29   | 3.63 $\pm$ 3.16  | 22.90 $\pm$ 6.49  | 0.00             | 0.66 $\pm$ 1.14  |
| <b>6c</b> | 3.05 $\pm$ 3.91   | 0.00             | 28.29 $\pm$ 6.91  | 16.29 $\pm$ 0.63 | 13.81 $\pm$ 2.27 |
| <b>6d</b> | 10.26 $\pm$ 4.44  | 0.00             | 29.09 $\pm$ 6.92  | 29.59 $\pm$ 0.16 | 42.56 $\pm$ 0.84 |
| <b>6e</b> | 3.21 $\pm$ 2.37   | 6.92 $\pm$ 2.62  | 29.45 $\pm$ 7.71  | 25.64 $\pm$ 1.00 | 14.40 $\pm$ 2.54 |
| <b>6f</b> | 7.82 $\pm$ 4.10   | 0.00             | 20.78 $\pm$ 5.63  | 24.96 $\pm$ 1.05 | 16.76 $\pm$ 2.39 |
| <b>6g</b> | 35.30 $\pm$ 4.37  | 6.59 $\pm$ 4.98  | 11.81 $\pm$ 7.50  | 20.29 $\pm$ 0.78 | 9.72 $\pm$ 1.96  |
| <b>6h</b> | 11.21 $\pm$ 10.01 | 5.79 $\pm$ 10.03 | 28.24 $\pm$ 10.35 | 20.64 $\pm$ 0.77 | 17.38 $\pm$ 1.49 |
| <b>6i</b> | 7.79 $\pm$ 6.01   | 11.68 $\pm$ 5.99 | 28.56 $\pm$ 9.02  | 23.54 $\pm$ 0.76 | 13.27 $\pm$ 0.21 |
| <b>6j</b> | 0.00              | 3.64 $\pm$ 6.30  | 0.00              | 15.42 $\pm$ 5.60 | 20.51 $\pm$ 6.76 |
| <b>6k</b> | 0.00              | 0.75 $\pm$ 1.29  | 3.72 $\pm$ 1.80   | 16.57 $\pm$ 2.30 | 13.94 $\pm$ 4.06 |
| <b>6l</b> | 0.61 $\pm$ 0.60   | 4.61 $\pm$ 4.79  | 3.91 $\pm$ 0.85   | 13.17 $\pm$ 4.88 | 12.69 $\pm$ 2.89 |

**Table S2.** Mean  $\pm$  SD values of growth inhibition ratios at 25  $\mu$ m drug concentration.

| Comp.     | Hela             | MCF-7             | SW480             | A549             | Hek293            |
|-----------|------------------|-------------------|-------------------|------------------|-------------------|
| <b>6a</b> | 88.49 $\pm$ 0.67 | 85.28 $\pm$ 1.62  | 82.31 $\pm$ 4.36  | 37.39 $\pm$ 0.39 | 61.06 $\pm$ 4.71  |
| <b>6b</b> | 11.48 $\pm$ 4.88 | 2.70 $\pm$ 4.67   | 29.49 $\pm$ 11.23 | 30.87 $\pm$ 0.32 | 45.90 $\pm$ 1.35  |
| <b>6c</b> | 53.46 $\pm$ 2.45 | 41.99 $\pm$ 3.02  | 58.38 $\pm$ 7.58  | 49.42 $\pm$ 0.59 | 54.61 $\pm$ 2.29  |
| <b>6d</b> | 93.10 $\pm$ 0.17 | 88.61 $\pm$ 2.73  | 94.16 $\pm$ 3.21  | 93.02 $\pm$ 0.20 | 84.57 $\pm$ 4.34  |
| <b>6e</b> | 80.93 $\pm$ 2.05 | 77.85 $\pm$ 0.45  | 61.02 $\pm$ 7.14  | 61.06 $\pm$ 0.13 | 63.28 $\pm$ 11.39 |
| <b>6f</b> | 58.74 $\pm$ 2.64 | 31.39 $\pm$ 3.72  | 55.73 $\pm$ 6.94  | 57.09 $\pm$ 0.06 | 64.34 $\pm$ 14.59 |
| <b>6g</b> | 93.85 $\pm$ 0.20 | 34.57 $\pm$ 2.06  | 55.95 $\pm$ 5.88  | 43.88 $\pm$ 1.11 | 59.91 $\pm$ 16.92 |
| <b>6h</b> | 21.18 $\pm$ 4.40 | 0.00              | 37.79 $\pm$ 9.83  | 52.29 $\pm$ 0.76 | 45.96 $\pm$ 22.40 |
| <b>6i</b> | 29.24 $\pm$ 5.29 | 0.00              | 38.93 $\pm$ 9.65  | 51.77 $\pm$ 0.50 | 46.91 $\pm$ 16.67 |
| <b>6j</b> | 3.75 $\pm$ 0.91  | 1.97 $\pm$ 2.75   | 0.92 $\pm$ 1.34   | 38.67 $\pm$ 8.59 | 56.07 $\pm$ 7.28  |
| <b>6k</b> | 44.12 $\pm$ 0.92 | 24.38 $\pm$ 10.99 | 36.88 $\pm$ 0.52  | 51.92 $\pm$ 6.36 | 63.46 $\pm$ 10.25 |
| <b>6l</b> | 28.96 $\pm$ 1.88 | 9.52 $\pm$ 8.26   | 16.49 $\pm$ 0.53  | 47.07 $\pm$ 5.40 | 68.77 $\pm$ 13.28 |



## Supplementary material

**Table S3.** The total energy for the tested compounds **5a-5k** against docked proteins binding pockets.

| Comp. No                | AKT1         | CCND1        | EGFR         | GADPH        | HRAS         |
|-------------------------|--------------|--------------|--------------|--------------|--------------|
|                         | PDB ID: 4EJN | PDB ID: 2W96 | PDB ID: 1M17 | PDB ID: 1QXS | PDB ID: 121P |
| Total energy (kcal/mol) |              |              |              |              |              |
| 5a                      | -110.4517    | -92.014943   | -113.49261   | -96.9778     | -121.525     |
| 5b                      | -109.487     | -92.801225   | -100.97898   | -102.746     | -112.007     |
| 5c                      | -152.56195   | -92.328519   | -115.86657   | -118.758     | -147.565     |
| 5d                      | -109.98437   | -100.28895   | -105.85058   | -106.27      | -139.565     |
| 5e                      | -136.21449   | -90.093949   | -104.47254   | -97.2435     | -109.701     |
| 5f                      | -134.21769   | -85.643314   | -108.24462   | -96.5164     | -124.008     |
| 5g                      | -117.78228   | -92.676583   | -106.77327   | -105.627     | -109.648     |
| 5h                      | -114.13335   | -96.377126   | -110.5033    | -103.961     | -132.392     |
| 5i                      | -112.55216   | -85.210883   | -103.1928    | -107.965     | -114.3       |
| 5j                      | -120.06915   | -97.683944   | -117.15296   | -97.7188     | -118.017     |
| 5k                      | -131.10572   | -86.667097   | -99.041469   | -102.411     | -125.194     |
| sinomenine              | -96.90419    | -66.984998   | -74.70841    | -74.5722     | -82.9715     |

| Comp. No                | IL6          | MYC          | PTEN         | STAT3        | TP53         | VEGFA        |
|-------------------------|--------------|--------------|--------------|--------------|--------------|--------------|
|                         | PDB ID: 1N26 | PDB ID: 5I50 | PDB ID: 1D5R | PDB ID: 6NJS | PDB ID: 2H59 | PDB ID: 1FLT |
| Total energy (kcal/mol) |              |              |              |              |              |              |
| 5a                      | -75.779181   | -8.974544    | -94.945824   | -100.46753   | -96.439231   | -71.452019   |
| 5b                      | -82.592442   | -12.3089     | -92.312345   | -92.584822   | -96.639242   | -54.26271    |
| 5c                      | -76.288248   | -55.318323   | -97.488565   | -104.86825   | -110.11159   | -90.02963    |
| 5d                      | -75.881368   | -34.276427   | -102.03249   | -96.074973   | -95.823975   | -75.392292   |

## Supplementary material

|            |            |            |            |            |            |            |
|------------|------------|------------|------------|------------|------------|------------|
| 5e         | -68.383119 | -10.428299 | -74.778382 | -104.45959 | -91.707905 | -70.406066 |
| 5f         | -71.536604 | -40.056095 | -88.752568 | -88.94488  | -105.39038 | -71.933654 |
| 5g         | -71.232017 | -40.452157 | -113.77743 | -103.26589 | -111.89281 | -79.008219 |
| 5h         | -80.671686 | -44.509336 | -93.003952 | -86.437455 | -115.43665 | -72.333438 |
| 5i         | -62.890056 | -13.745778 | -92.634638 | -93.805265 | -95.467208 | -75.814431 |
| 5j         | -75.633935 | -34.652115 | -93.927298 | -86.887086 | -96.537606 | -70.061337 |
| 5k         | -67.495732 | -41.877304 | -107.55105 | -98.08101  | -124.89364 | -72.480579 |
| sinomenine | -53.674125 | -41.524897 | -64.40118  | -66.789697 | -79.710613 | -51.953652 |

**Table S4.** The total energy for the tested compounds **6a-6l** against docked proteins binding pockets.

| Comp. No                | AKT1         | CCND1        | EGFR         | ERBB2        | GADPH        | HRAS         |
|-------------------------|--------------|--------------|--------------|--------------|--------------|--------------|
|                         | PDB ID: 4EJN | PDB ID: 2W96 | PDB ID: 1M17 | PDB ID: 3PP0 | PDB ID: 1QXS | PDB ID: 121P |
| Total energy (kcal/mol) |              |              |              |              |              |              |
| 6a                      | -155.152542  | -85.819282   | -102.71573   | -97.914798   | -89.3104     | -126.074     |
| 6b                      | -143.51096   | -93.702009   | -115.57974   | -111.85183   | -95.4181     | -112.662     |
| 6c                      | -117.814818  | -94.091713   | -105.07849   | -96.038604   | -96.8829     | -120.792     |
| 6d                      | -134.025843  | -82.064413   | -103.10902   | -106.17696   | -96.7202     | -133.267     |
| 6e                      | -129.107106  | -92.365618   | -101.99209   | -108.70016   | -94.2277     | -105.098     |
| 6f                      | -121.550631  | -92.204911   | -113.66322   | -109.7887    | -103.834     | -117.736     |
| 6g                      | -104.509119  | -87.905554   | -106.56283   | -96.849524   | -106.202     | -117.264     |
| 6h                      | -110.348304  | -97.900196   | -105.29039   | -84.360193   | -107.937     | -125.747     |
| 6i                      | -116.615593  | -92.693974   | -100.71573   | -93.429995   | -110.16      | -144.341     |
| 6j                      | -139.997316  | -96.545364   | -112.1828    | -112.68309   | -101.915     | -134.795     |
| 6k                      | -124.013157  | -91.581717   | -116.20325   | -94.416143   | -99.9461     | -116.475     |

## Supplementary material

|            |             |            |            |            |          |          |
|------------|-------------|------------|------------|------------|----------|----------|
| 6l         | -136.820447 | -93.027433 | -109.59803 | -105.45488 | -105.253 | -127.087 |
| sinomenine | -96.102089  | -71.538623 | -75.796964 | -70.356615 | -74.5722 | -82.9715 |

| Comp. No                | IL6          | KARS         | MYC          | PTEN         | STAT3        | TP53         | VEGFR        |
|-------------------------|--------------|--------------|--------------|--------------|--------------|--------------|--------------|
|                         | PDB ID: 1N26 | PDB ID: 4LYH | PDB ID: 5I50 | PDB ID: 1D5R | PDB ID: 6NJS | PDB ID: 2H59 | PDB ID: 1FLT |
| Total energy (kcal/mol) |              |              |              |              |              |              |              |
| 6a                      | -71.647855   | -132.867067  | -40.080337   | -91.606693   | -99.476774   | -102.313     | -81.769509   |
| 6b                      | -75.468949   | -117.201122  | -21.638076   | -108.52824   | -100.66394   | -109.071     | -68.587673   |
| 6c                      | -68.965233   | -110.057307  | -29.018839   | -92.061217   | -88.464252   | -105.239     | -64.756449   |
| 6d                      | -78.230692   | -113.109424  | -52.036912   | -112.64237   | -97.491569   | -105.46      | -58.840218   |
| 6e                      | -71.342559   | -124.720135  | -37.966443   | -94.311978   | -90.146547   | -100.326     | -78.221192   |
| 6f                      | -77.711822   | -123.487573  | -41.312645   | -109.66785   | -96.277285   | -103.482     | -72.609809   |
| 6g                      | -60.853169   | -117.865833  | -4.275516    | -96.63994    | -85.11816    | -97.4213     | -74.759565   |
| 6h                      | -83.204263   | -127.253945  | -38.630007   | -104.81761   | -93.077551   | -94.8547     | -65.555756   |
| 6i                      | -77.290155   | -127.243938  | -34.587211   | -121.89391   | -91.794092   | -97.0393     | -68.257331   |
| 6j                      | -71.596769   | -128.724795  | -40.534216   | -119.81884   | -117.91884   | -104.012     | -72.987394   |
| 6k                      | -90.086292   | -113.991245  | -50.336598   | -103.78144   | -93.282852   | -105.069     | -74.469279   |
| 6l                      | -73.523545   | -125.62224   | -30.564061   | -86.536363   | -96.197188   | -91.2632     | -66.015682   |
| sinomenine              | -51.477432   | -81.898493   | -39.729746   | -61.187369   | -65.431933   | -96.7829     | -48.755511   |

# Supplementary material

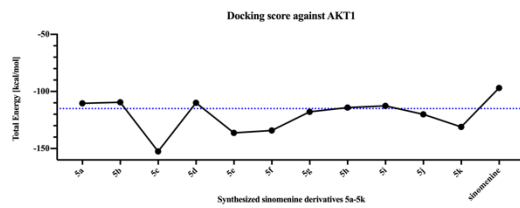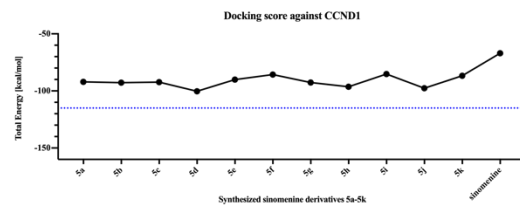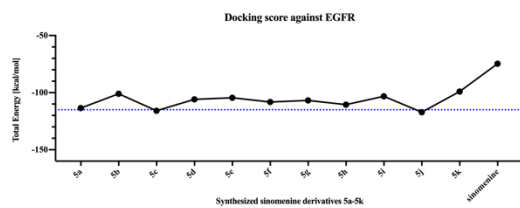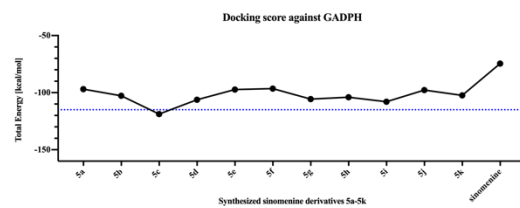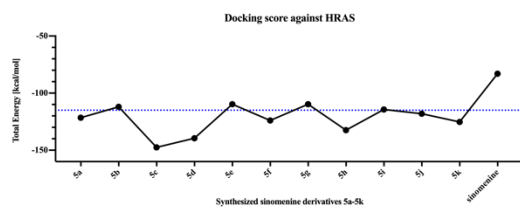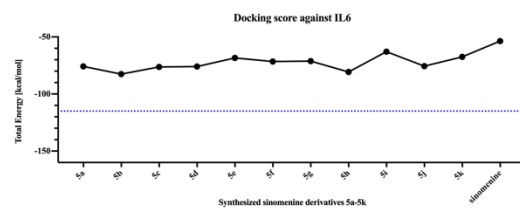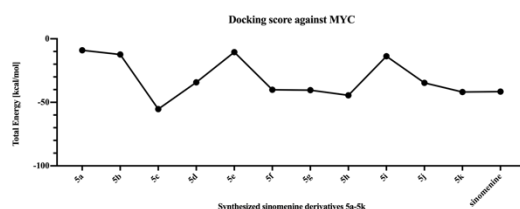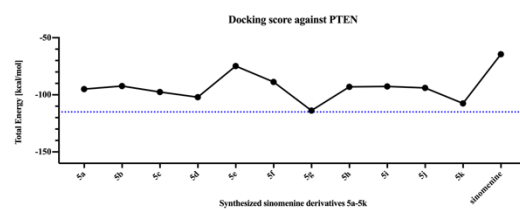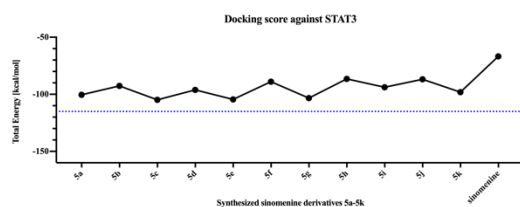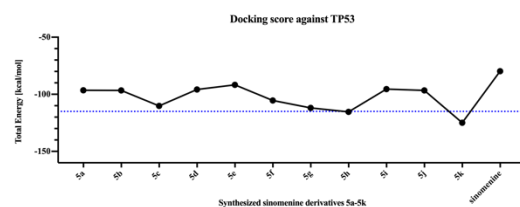

# Supplementary material

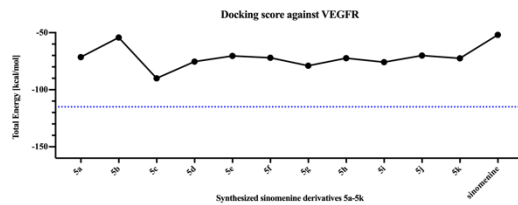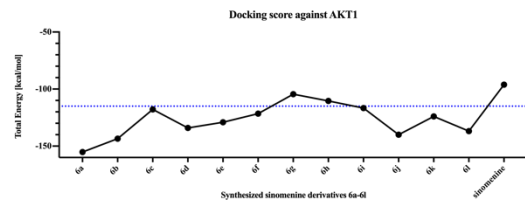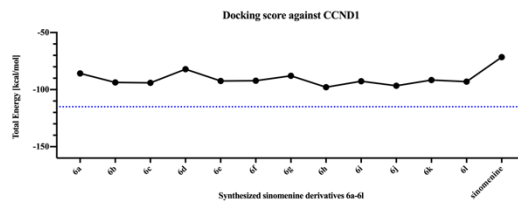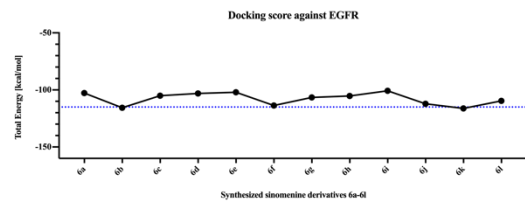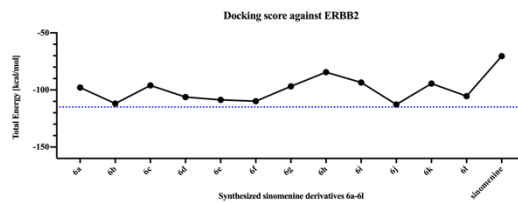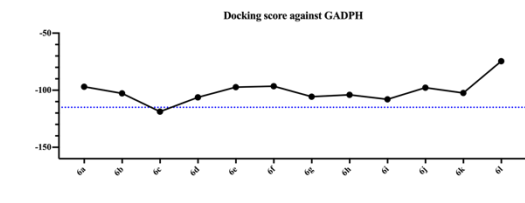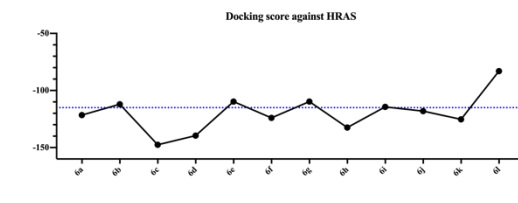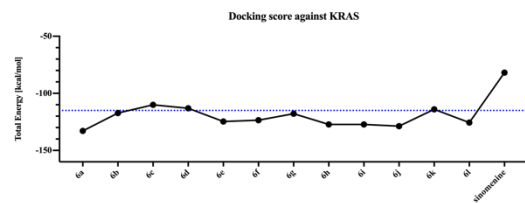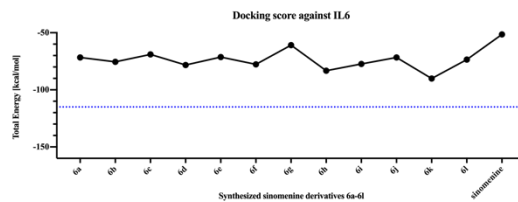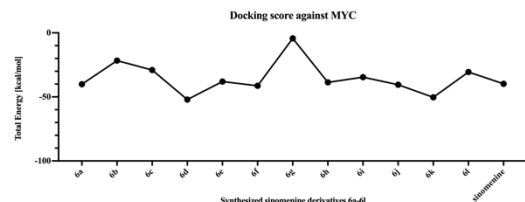

## Supplementary material

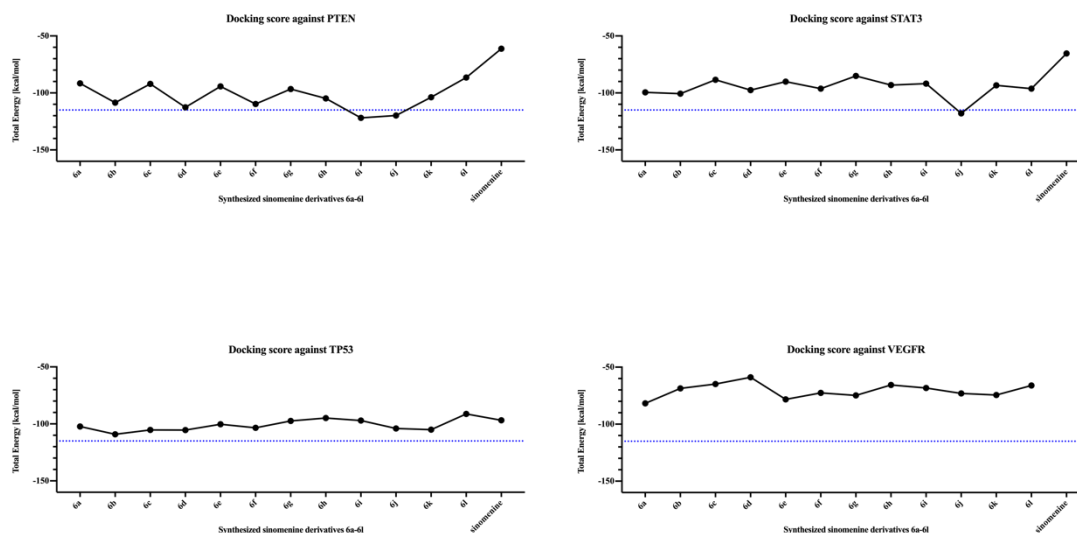

**Figure S59.** The total energy of molecular docking between compounds and each target.

**Table S5.** The various interactions for the most promising test compounds into the AKT1 binding pockets.

| AKT1  |                |         |                           |          |              |          |                 |          |               |  |
|-------|----------------|---------|---------------------------|----------|--------------|----------|-----------------|----------|---------------|--|
| Comp. | Hydrogen Bonds |         | Hydrophobic Interactions  |          | Salt Bridges |          | $\pi$ -Stacking |          | Halogen Bonds |  |
| No    | Length Å       | AA      | AA                        | Length Å | AA           | Length Å | AA              | Length Å | AA            |  |
| 5g    | 2.52           | ASN54A  | GLN79A, TRP80A, LEU202A,  | -        |              | -        |                 | -        |               |  |
|       | 2.86           | GLN79A  | LEU210A, LEU264A, VAL270A |          |              |          |                 |          |               |  |
| 5i    | 3.42           | ASN53A  | ASN53A, TRP80A, VAL270A   | -        |              | -        |                 | -        |               |  |
|       | 2.7            | GLN59A  |                           |          |              |          |                 |          |               |  |
| 5j    | 2.51           | ASN54A  | THR82A, ILE84A, TYR272A,  | 4.73     | ASP274A      | -        |                 | -        |               |  |
|       | 2.99           | GLN79A  | ARG273A, ASP274A, GLU298A |          |              |          |                 |          |               |  |
| 6a    | 2.2            | THR81A  | TRP80A, ILE84A, LEU210A,  | -        |              | -        |                 | -        |               |  |
|       | 1.73           | THR211A | LEU264A, VAL270A, ASP292A |          |              |          |                 |          |               |  |
| 6d    | 2.5            | ASN54A  | TRP80A, THR82A, LEU210A,  | 5.5      | LYS179A      | -        |                 | -        |               |  |
|       | 2.48           | GLN79A  | LEU264A, VAL270A,         |          |              |          |                 |          |               |  |
|       | 2.46           | THR81A  | TYR272A, ASP274A          |          |              |          |                 |          |               |  |
| 6e    | 2.17           | THR82A  | GLN79A, TRP80A, THR82A,   | -        |              | 4.18     | TRP80A          | 3.47     | THR211A       |  |
|       | 3.61           | LYS179A | ILE84A, LEU264A, VAL270A, |          |              |          |                 |          |               |  |
|       | 3.44           | PHE293A | TYR272A, ASP274A          |          |              |          |                 |          |               |  |
|       | 3.11           | GLY294A |                           |          |              |          |                 |          |               |  |
| 6g    | 2.56           | GLN59A  | ASN53A, GLN79A, LEU202A   | -        |              | -        |                 | -        |               |  |
|       | 2.92           | GLN79A  |                           |          |              |          |                 |          |               |  |

AA: amino acids

**Table S6.** The various interactions for the most promising test compounds into the EGFR binding pockets.

AA: amino acids

pockets.

| HRAS  |                |         |                                                     |              |         |               |         |                 |        |
|-------|----------------|---------|-----------------------------------------------------|--------------|---------|---------------|---------|-----------------|--------|
| Comp. | Hydrogen Bonds |         | Hydrophobic Interactions                            | Salt Bridges |         | Halogen Bonds |         | $\pi$ -Stacking |        |
| No    | Length Å       | AA      | AA                                                  | Length Å     | AA      | Length Å      | AA      | Length Å        | AA     |
| 5g    | 2.36           | SER17A  | -                                                   | 3.71         | LYS117A | -             |         |                 | -      |
|       | 2.41           | ALA18A  |                                                     |              |         |               |         |                 |        |
| 5i    | 2.48           | LYS117A | TYR32A                                              | 4.01         | LYS117A | 3.98          | GLU31A  |                 | -      |
| 5j    |                | -       | ALA18A, PHE28A, VAL29A,<br>TYR32A, LYS117A, LYS147A | 2.47         | LYS117A |               | -       |                 | -      |
| 6a    | 3.32           | SER17A  | ALA18A, PHE28A, TYR32A,                             | 4.56         | LYS117A | 2.71          | ASP119A |                 | -      |
|       | 2.69           | ALA18A  | ALA146A                                             |              |         |               |         |                 |        |
| 6d    | 2.65           | GLY13A  | ALA18A, ILE21A, VAL29A,<br>TYR32A, ASP33A           |              | -       |               | -       |                 | -      |
|       | 2.7            | VAL14A  |                                                     |              |         |               |         |                 |        |
|       | 1.89           | GLY15A  |                                                     |              |         |               |         |                 |        |
|       | 2.14           | LYS16A  |                                                     |              |         |               |         |                 |        |
|       | 2.92           | GLU31A  |                                                     |              |         |               |         |                 |        |
|       | 2.2            | ASP33A  |                                                     |              |         |               |         |                 |        |
| 6e    | 2.47           | ASP30A  | ALA18A, PHE28A, TYR32A,                             | 4.73         | LYS117A | 3.61          | GLY15A  | 4.57            | PHE28A |
|       | 2.37           | LYS117A | LYS117A, ALA146A,<br>LYS147A                        |              |         |               |         |                 |        |
| 6g    | 3.32           | ASP30A  | LYS117A                                             | 3.54         | LYS117A | 2.96          | ASN86A  |                 | -      |
|       | 2.37           | ASP33A  |                                                     |              |         |               |         |                 |        |

## Supplementary material

**Table S8.** The various interactions for the most promising test compounds into the KRAS binding pockets.

| KRAS        |                |        |                                          |              |        |               |        |
|-------------|----------------|--------|------------------------------------------|--------------|--------|---------------|--------|
| Comp.<br>No | Hydrogen Bonds |        | Hydrophobic Interactions                 | Salt Bridges |        | Halogen Bonds |        |
|             | Length Å       | AA     | AA                                       | Length Å     | AA     | Length Å      | AA     |
| 6a          | 2.41           | CYS12B | GLU63B, ARG68B, TYR96B                   | 5.32         | LYS16B | 3.71          | GLU63B |
| 6d          | 3.01           | ARG68B | VAL9B, ALA11B, TYR96B,<br>ILE100B        | 4.57         | HIS95B | -             |        |
| 6e          | -              |        | VAL9B, LYS16B, GLU62B,<br>GLU63B, ARG68B | 4.04         | ARG68B | -             |        |
| 6g          | -              |        | ALA11B, GLU62B, ARG68B                   | 4.55         | LYS16B | -             |        |

AA: amino acids
